# Supplementary material for: Alkyne activation and polyhedral reorganization in benzothiazolate-capped osmium clusters on reaction with diethyl acetylenedicarboxylate (DEAD) and ethyl propiolate
Source: Royal Society of Chemistry journal article supplement (doi:10.1039/c7dt02933k), 2017-01-01
Supplement: c7dt02933k1.pdf [file c7dt02933k1.pdf]

## Supplementary Information

### Table of Contents

|                             |   |
|-----------------------------|---|
| Computational details ..... | 2 |
|-----------------------------|---|

## Computational Details

B3LYP geometries and energies for all optimized minima and transition state structures

### Species A

HF energy= -2015.19127372

No imaginary frequency

Zero-point correction= 0.178592 (Hartree/Particle)

Thermal correction to Energy= 0.210897

Thermal correction to Enthalpy= 0.211842

Thermal correction to Gibbs Free Energy= 0.111213

Sum of electronic and zero-point Energies= -2015.012682

Sum of electronic and thermal Energies= -2014.980376

Sum of electronic and thermal Enthalpies= -2014.979432

Sum of electronic and thermal Free Energies= -2015.080060

### Coordinates: A

|    |             |             |             |
|----|-------------|-------------|-------------|
| Os | -1.07660000 | 1.52240000  | 0.59750000  |
| Os | 0.70550000  | -0.65760000 | 1.15800000  |
| Os | 1.39160000  | 1.33210000  | -0.79400000 |
| O  | -2.66540000 | 3.99080000  | -0.41520000 |
| O  | -1.06230000 | 2.42900000  | 3.52180000  |
| O  | -3.45680000 | -0.35690000 | 1.07760000  |
| O  | -0.98380000 | -2.23410000 | 3.21300000  |
| O  | 2.06550000  | 1.01540000  | 3.32510000  |
| O  | 3.13660000  | -2.54560000 | 0.86400000  |
| O  | 1.63400000  | 3.66930000  | -2.82370000 |
| O  | 3.98300000  | 2.03170000  | 0.68210000  |
| O  | 2.79490000  | -0.83140000 | -2.46030000 |
| N  | -0.32970000 | -1.60200000 | -0.54600000 |
| C  | -2.04590000 | -0.82230000 | -3.67150000 |
| C  | -1.94470000 | 0.56980000  | -3.69640000 |
| C  | -1.29650000 | 1.26730000  | -2.66390000 |
| C  | -0.71030000 | 0.62760000  | -1.54590000 |
| C  | -1.48170000 | -1.49740000 | -2.58480000 |
| C  | -0.83590000 | -0.78600000 | -1.55610000 |
| C  | -2.05060000 | 3.07950000  | -0.07380000 |
| C  | -1.07350000 | 2.07930000  | 2.42490000  |
| C  | -2.56580000 | 0.35650000  | 0.91600000  |
| C  | -0.36850000 | -1.64450000 | 2.43440000  |
| C  | 1.55000000  | 0.39180000  | 2.50320000  |
| C  | 2.22700000  | -1.84110000 | 0.95690000  |
| C  | 1.50280000  | 2.81080000  | -2.06820000 |
| C  | 3.01290000  | 1.76010000  | 0.12470000  |
| C  | 2.28670000  | -0.01290000 | -1.82730000 |
| H  | 0.48000000  | 2.47170000  | 0.33210000  |
| S  | -1.43030000 | -3.22080000 | -2.24300000 |

|   |             |             |             |
|---|-------------|-------------|-------------|
| C | -0.56660000 | -2.86510000 | -0.77790000 |
| H | -0.25040000 | -3.65510000 | -0.10550000 |
| H | -1.24530000 | 2.35130000  | -2.73450000 |
| H | -2.37530000 | 1.11990000  | -4.52990000 |
| H | -2.54750000 | -1.36070000 | -4.47180000 |

---

**Species TSAA\_alt**

HF energy= -2015.16190052

Imaginary frequency= 23i

Zero-point correction= 0.178526 (Hartree/Particle)

Thermal correction to Energy= 0.210104

Thermal correction to Enthalpy= 0.211048

Thermal correction to Gibbs Free Energy= 0.111888

Sum of electronic and zero-point Energies= -2014.983374

Sum of electronic and thermal Energies= -2014.951797

Sum of electronic and thermal Enthalpies= -2014.950852

Sum of electronic and thermal Free Energies= -2015.050012

**Coordinates: TSAA\_alt**

|    |             |             |             |
|----|-------------|-------------|-------------|
| Os | -0.94310000 | 1.54460000  | 0.50780000  |
| Os | 0.66390000  | -0.84670000 | 0.95910000  |
| Os | 1.89940000  | 1.28210000  | -0.38340000 |
| O  | -2.35820000 | 4.15940000  | -0.32270000 |
| O  | 0.01690000  | 2.88280000  | 3.14730000  |
| O  | -3.45550000 | 0.27070000  | 1.74320000  |
| O  | -1.64380000 | -2.25730000 | 2.46030000  |
| O  | 1.88430000  | 0.30350000  | 3.52330000  |
| O  | 2.63700000  | -3.22650000 | 1.00640000  |
| O  | 2.35270000  | 1.97640000  | -3.31070000 |
| O  | 3.35380000  | 3.80960000  | 0.50110000  |
| O  | 4.31310000  | -0.62740000 | -0.17020000 |
| N  | -0.18750000 | -1.50500000 | -0.97090000 |
| C  | -2.37740000 | -0.77820000 | -3.81280000 |
| C  | -2.83920000 | 0.48830000  | -3.47200000 |
| C  | -2.43100000 | 1.12310000  | -2.28350000 |
| C  | -1.53910000 | 0.55320000  | -1.35790000 |
| C  | -1.49280000 | -1.37820000 | -2.91570000 |
| C  | -1.08390000 | -0.73190000 | -1.72480000 |
| C  | -1.83320000 | 3.17300000  | -0.04320000 |
| C  | -0.31550000 | 2.37080000  | 2.17250000  |
| C  | -2.49470000 | 0.73180000  | 1.30940000  |
| C  | -0.80480000 | -1.71960000 | 1.88580000  |
| C  | 1.41500000  | -0.10900000 | 2.55380000  |
| C  | 1.91230000  | -2.32890000 | 0.95130000  |
| C  | 2.22660000  | 1.77770000  | -2.18320000 |

|   |            |            |            |
|---|------------|------------|------------|
| C | 2.8040000  | 2.8853000  | 0.0893000  |
| C | 3.3576000  | 0.0140000  | -0.2111000 |
| H | 0.3813000  | 2.2842000  | -0.4772000 |
| S | -0.7325000 | -2.9552000 | -3.0405000 |
| C | 0.0629000  | -2.6594000 | -1.5345000 |
| H | 0.7271000  | -3.3985000 | -1.1031000 |
| H | -2.8450000 | 2.1095000  | -2.0894000 |
| H | -3.5340000 | 1.0003000  | -4.1351000 |
| H | -2.6893000 | -1.2757000 | -4.7270000 |

---

**Species A\_alt**

HF energy= -2015.16390934

No imaginary frequency

Zero-point correction= 0.178052 (Hartree/Particle)

Thermal correction to Energy= 0.210656

Thermal correction to Enthalpy= 0.211600

Thermal correction to Gibbs Free Energy= 0.108667

Sum of electronic and zero-point Energies= -2014.985857

Sum of electronic and thermal Energies= -2014.953253

Sum of electronic and thermal Enthalpies= -2014.952309

Sum of electronic and thermal Free Energies= -2015.055243

**Coordinates: A\_alt**

|    |            |            |            |
|----|------------|------------|------------|
| Os | -0.8130000 | 1.5821000  | 0.4079000  |
| Os | 0.6116000  | -0.9013000 | 0.8070000  |
| Os | 2.0177000  | 1.3136000  | -0.1192000 |
| O  | -2.1634000 | 4.1773000  | -0.6139000 |
| O  | 0.4584000  | 3.1989000  | 2.7469000  |
| O  | -3.0962000 | 0.5294000  | 2.1834000  |
| O  | -1.8092000 | -2.6183000 | 1.7091000  |
| O  | 1.3117000  | -0.1010000 | 3.6757000  |
| O  | 2.7545000  | -3.1242000 | 0.7122000  |
| O  | 3.1806000  | 0.6234000  | -2.8190000 |
| O  | 2.9940000  | 4.2688000  | -0.2170000 |
| O  | 4.4262000  | 0.0514000  | 1.3183000  |
| N  | -0.0490000 | -1.2982000 | -1.2698000 |
| C  | -2.7884000 | -0.7699000 | -3.6375000 |
| C  | -3.4489000 | 0.2964000  | -3.0363000 |
| C  | -2.9524000 | 0.9026000  | -1.8655000 |
| C  | -1.7828000 | 0.4806000  | -1.2142000 |
| C  | -1.6377000 | -1.2345000 | -2.9961000 |
| C  | -1.1724000 | -0.6495000 | -1.7971000 |
| C  | -1.6705000 | 3.2034000  | -0.2531000 |
| C  | 0.0456000  | 2.5801000  | 1.8668000  |
| C  | -2.2282000 | 0.9311000  | 1.5452000  |

|   |             |             |             |
|---|-------------|-------------|-------------|
| C | -0.91530000 | -1.97470000 | 1.37670000  |
| C | 1.05570000  | -0.39330000 | 2.58880000  |
| C | 1.95060000  | -2.29480000 | 0.72230000  |
| C | 2.78330000  | 0.91540000  | -1.77550000 |
| C | 2.60170000  | 3.19020000  | -0.23440000 |
| C | 3.51350000  | 0.49710000  | 0.77790000  |
| H | 0.43000000  | 1.86620000  | -0.88810000 |
| S | -0.58440000 | -2.56030000 | -3.46190000 |
| C | 0.35240000  | -2.28190000 | -2.03150000 |
| H | 1.19980000  | -2.91210000 | -1.78820000 |
| H | -3.50830000 | 1.75040000  | -1.47060000 |
| H | -4.35970000 | 0.68330000  | -3.48910000 |
| H | -3.15440000 | -1.22520000 | -4.55360000 |

---

### Species B

HF energy= -611.696894688

No imaginary frequency

Zero-point correction= 0.172339 (Hartree/Particle)

Thermal correction to Energy= 0.185794

Thermal correction to Enthalpy= 0.186738

Thermal correction to Gibbs Free Energy= 0.129640

Sum of electronic and zero-point Energies= -611.524555

Sum of electronic and thermal Energies= -611.511101

Sum of electronic and thermal Enthalpies= -611.510157

Sum of electronic and thermal Free Energies= -611.567255

### Coordinates: B

|   |             |             |             |
|---|-------------|-------------|-------------|
| C | 0.90410000  | 1.99940000  | -0.31260000 |
| C | 1.76040000  | 1.18370000  | -0.04160000 |
| C | 2.71870000  | 0.13700000  | 0.26880000  |
| O | 2.42480000  | -1.03440000 | 0.34220000  |
| O | 3.94490000  | 0.65320000  | 0.45030000  |
| C | 5.00150000  | -0.29180000 | 0.76940000  |
| H | 5.91170000  | 0.21180000  | 0.43130000  |
| H | 4.84740000  | -1.20100000 | 0.18040000  |
| C | 5.04320000  | -0.59330000 | 2.26100000  |
| H | 4.13100000  | -1.10920000 | 2.57870000  |
| H | 5.89970000  | -1.24290000 | 2.48130000  |
| H | 5.15150000  | 0.32940000  | 2.84290000  |
| C | -0.11510000 | 3.00750000  | -0.54870000 |
| O | -0.70350000 | 3.58390000  | 0.33700000  |
| O | -0.30340000 | 3.20140000  | -1.86300000 |
| C | -1.30520000 | 4.19090000  | -2.21370000 |
| H | -2.26220000 | 3.88800000  | -1.77310000 |
| H | -1.02000000 | 5.14920000  | -1.76420000 |

|   |             |            |             |
|---|-------------|------------|-------------|
| C | -1.36330000 | 4.25870000 | -3.72850000 |
| H | -1.64110000 | 3.28760000 | -4.15400000 |
| H | -2.11260000 | 4.99820000 | -4.03590000 |
| H | -0.39390000 | 4.55480000 | -4.14530000 |

---

### Species TSABC

HF energy= -2626.86493549

Imaginary frequency= 54i

Zero-point correction= 0.351297 (Hartree/Particle)

Thermal correction to Energy= 0.398339

Thermal correction to Enthalpy= 0.399284

Thermal correction to Gibbs Free Energy= 0.262997

Sum of electronic and zero-point Energies= -2626.513639

Sum of electronic and thermal Energies= -2626.466596

Sum of electronic and thermal Enthalpies= -2626.465652

Sum of electronic and thermal Free Energies= -2626.601938

### Coordinates: TSABC

|    |             |             |             |
|----|-------------|-------------|-------------|
| Os | -1.43480000 | 1.37880000  | 1.04890000  |
| Os | 0.34240000  | -0.91020000 | 1.22730000  |
| Os | 1.63080000  | 1.66820000  | 1.35130000  |
| O  | -2.84040000 | 4.09580000  | 0.61700000  |
| O  | -1.78660000 | 1.64190000  | 4.12630000  |
| O  | -3.96250000 | -0.34280000 | 0.83220000  |
| O  | -1.96370000 | -2.93200000 | 0.93210000  |
| O  | 0.17770000  | -0.94540000 | 4.28010000  |
| O  | 2.62880000  | -2.99040000 | 1.26850000  |
| O  | 4.08690000  | -0.09130000 | 1.96770000  |
| O  | 3.03000000  | 4.42540000  | 1.02990000  |
| O  | 1.36390000  | 2.24780000  | 4.28700000  |
| N  | 0.40380000  | -0.73930000 | -0.98030000 |
| C  | -1.20750000 | 0.58330000  | -3.99020000 |
| C  | -2.07350000 | 1.51990000  | -3.43320000 |
| C  | -2.10800000 | 1.75140000  | -2.04480000 |
| C  | -1.30280000 | 1.06510000  | -1.11580000 |
| C  | -0.39590000 | -0.12000000 | -3.09920000 |
| C  | -0.45650000 | 0.10190000  | -1.70320000 |
| C  | -2.30350000 | 3.08620000  | 0.75620000  |
| C  | -1.59590000 | 1.54200000  | 2.99620000  |
| C  | -3.00250000 | 0.28560000  | 0.93590000  |
| C  | -1.11150000 | -2.16210000 | 1.03050000  |
| C  | 0.23160000  | -0.91000000 | 3.12790000  |
| C  | 1.80480000  | -2.18180000 | 1.22290000  |
| C  | 3.14450000  | 0.51760000  | 1.69860000  |
| C  | 2.45880000  | 3.43280000  | 1.11370000  |

|   |             |             |             |
|---|-------------|-------------|-------------|
| C | 1.45460000  | 2.02020000  | 3.16000000  |
| H | 0.06190000  | 2.44590000  | 0.88770000  |
| S | 0.78790000  | -1.36480000 | -3.45990000 |
| C | 1.09420000  | -1.52540000 | -1.76370000 |
| H | 1.82230000  | -2.23740000 | -1.39910000 |
| H | -2.81200000 | 2.49970000  | -1.68740000 |
| H | -2.74240000 | 2.08220000  | -4.08300000 |
| H | -1.17280000 | 0.39920000  | -5.06070000 |
| C | 2.10030000  | 2.34010000  | -1.80660000 |
| C | 2.99080000  | 1.54980000  | -1.54710000 |
| C | 4.10820000  | 0.60760000  | -1.47810000 |
| O | 3.97390000  | -0.59510000 | -1.45940000 |
| O | 5.26330000  | 1.27560000  | -1.47680000 |
| C | 6.49190000  | 0.48370000  | -1.49240000 |
| H | 7.19160000  | 1.11080000  | -2.05160000 |
| H | 6.29910000  | -0.43760000 | -2.04880000 |
| C | 6.98190000  | 0.20300000  | -0.08100000 |
| H | 6.27050000  | -0.42050000 | 0.46940000  |
| H | 7.94020000  | -0.32930000 | -0.13150000 |
| H | 7.13650000  | 1.13630000  | 0.47260000  |
| C | 1.18190000  | 3.42850000  | -2.14960000 |
| O | 0.73150000  | 4.20450000  | -1.34050000 |
| O | 0.97730000  | 3.45330000  | -3.46660000 |
| C | 0.11720000  | 4.52440000  | -3.95280000 |
| H | -0.86180000 | 4.41260000  | -3.47550000 |
| H | 0.54760000  | 5.48040000  | -3.63440000 |
| C | 0.04520000  | 4.39260000  | -5.46160000 |
| H | -0.37730000 | 3.42260000  | -5.74650000 |
| H | -0.59620000 | 5.18400000  | -5.86780000 |
| H | 1.03870000  | 4.48730000  | -5.91430000 |

---

### Species C

HF energy= -2626.87681841

No imaginary frequency

Zero-point correction= 0.351697 (Hartree/Particle)

Thermal correction to Energy= 0.398849

Thermal correction to Enthalpy= 0.399794

Thermal correction to Gibbs Free Energy= 0.264630

Sum of electronic and zero-point Energies= -2626.525121

Sum of electronic and thermal Energies= -2626.477969

Sum of electronic and thermal Enthalpies= -2626.477025

Sum of electronic and thermal Free Energies= -2626.612188

Coordinates: C

Os -1.40210000 1.26260000 1.04890000

|    |             |             |             |
|----|-------------|-------------|-------------|
| Os | 0.66070000  | -0.74230000 | 1.10340000  |
| Os | 1.70970000  | 2.11080000  | 1.21330000  |
| O  | -3.12660000 | 3.82750000  | 0.90180000  |
| O  | -1.81240000 | 1.11500000  | 4.12650000  |
| O  | -3.69750000 | -0.72400000 | 0.69210000  |
| O  | -1.27990000 | -3.11460000 | 1.19430000  |
| O  | 0.88900000  | -0.76390000 | 4.15050000  |
| O  | 3.31450000  | -2.32320000 | 0.87370000  |
| O  | 4.42820000  | 0.96760000  | 2.12210000  |
| O  | 2.56460000  | 5.09020000  | 1.34810000  |
| O  | 0.96950000  | 2.42180000  | 4.17460000  |
| N  | 0.35940000  | -0.73110000 | -1.10060000 |
| C  | -1.39820000 | 0.65410000  | -3.99840000 |
| C  | -2.15330000 | 1.65490000  | -3.39340000 |
| C  | -2.10500000 | 1.86800000  | -2.00220000 |
| C  | -1.30020000 | 1.11630000  | -1.12590000 |
| C  | -0.57980000 | -0.10460000 | -3.15930000 |
| C  | -0.52390000 | 0.13040000  | -1.76660000 |
| C  | -2.47430000 | 2.87900000  | 0.92130000  |
| C  | -1.57820000 | 1.19620000  | 3.00280000  |
| C  | -2.82680000 | 0.01260000  | 0.85670000  |
| C  | -0.56390000 | -2.21170000 | 1.14090000  |
| C  | 0.79680000  | -0.71590000 | 3.00100000  |
| C  | 2.33700000  | -1.70980000 | 0.92850000  |
| C  | 3.42440000  | 1.38450000  | 1.74680000  |
| C  | 2.20020000  | 4.00820000  | 1.24140000  |
| C  | 1.20880000  | 2.24670000  | 3.06640000  |
| H  | -0.01420000 | 2.49390000  | 0.82910000  |
| S  | 0.46810000  | -1.44660000 | -3.58360000 |
| C  | 0.91500000  | -1.58520000 | -1.91930000 |
| H  | 1.62870000  | -2.33410000 | -1.60200000 |
| H  | -2.74540000 | 2.64950000  | -1.59980000 |
| H  | -2.81230000 | 2.27060000  | -4.00340000 |
| H  | -1.45200000 | 0.46330000  | -5.06710000 |
| C  | 1.69940000  | 2.47860000  | -1.05240000 |
| C  | 2.50280000  | 1.53110000  | -0.90380000 |
| C  | 3.62430000  | 0.68710000  | -1.36260000 |
| O  | 3.49960000  | -0.33530000 | -1.99560000 |
| O  | 4.78570000  | 1.24650000  | -1.00690000 |
| C  | 6.00660000  | 0.56940000  | -1.43840000 |
| H  | 6.73300000  | 1.38270000  | -1.51520000 |
| H  | 5.82850000  | 0.14280000  | -2.42950000 |
| C  | 6.44070000  | -0.48820000 | -0.43550000 |
| H  | 5.69900000  | -1.29010000 | -0.35910000 |
| H  | 7.39010000  | -0.92840000 | -0.76600000 |
| H  | 6.58940000  | -0.05040000 | 0.55730000  |



|   |             |            |             |
|---|-------------|------------|-------------|
| C | 1.05480000  | 3.57910000 | -1.78560000 |
| O | 0.54690000  | 4.54680000 | -1.26930000 |
| O | 1.15010000  | 3.35600000 | -3.10300000 |
| C | 0.54250000  | 4.36300000 | -3.95740000 |
| H | -0.52000000 | 4.42970000 | -3.69950000 |
| H | 1.00870000  | 5.33030000 | -3.73830000 |
| C | 0.76030000  | 3.92550000 | -5.39310000 |
| H | 0.29270000  | 2.95140000 | -5.57460000 |
| H | 0.31190000  | 4.65980000 | -6.07330000 |
| H | 1.82890000  | 3.84860000 | -5.62420000 |

---

### Species TSCD

HF energy= -2626.85804983

Imaginary frequency= 809i

Zero-point correction= 0.349202 (Hartree/Particle)

Thermal correction to Energy= 0.396245

Thermal correction to Enthalpy= 0.397190

Thermal correction to Gibbs Free Energy= 0.260741

Sum of electronic and zero-point Energies= -2626.508847

Sum of electronic and thermal Energies= -2626.461804

Sum of electronic and thermal Enthalpies= -2626.460860

Sum of electronic and thermal Free Energies= -2626.597308

### Coordinates: TSCD

|    |             |             |             |
|----|-------------|-------------|-------------|
| Os | -1.37240000 | 1.26550000  | 1.06240000  |
| Os | 0.40550000  | -0.92930000 | 1.22380000  |
| Os | 1.79910000  | 1.82310000  | 1.37010000  |
| O  | -2.55090000 | 4.12310000  | 0.79570000  |
| O  | -1.84760000 | 1.27970000  | 4.13380000  |
| O  | -4.05170000 | -0.13360000 | 0.77280000  |
| O  | -1.90730000 | -2.93320000 | 1.12910000  |
| O  | 0.43440000  | -0.91770000 | 4.28120000  |
| O  | 2.74060000  | -2.97190000 | 1.14160000  |
| O  | 3.86500000  | -0.14110000 | 2.52290000  |
| O  | 3.67990000  | 4.28460000  | 1.53290000  |
| O  | 0.87010000  | 2.74460000  | 4.16180000  |
| N  | 0.34590000  | -0.86630000 | -0.99130000 |
| C  | -1.32790000 | 0.46370000  | -3.96290000 |
| C  | -2.13580000 | 1.44250000  | -3.39100000 |
| C  | -2.12560000 | 1.68140000  | -2.00310000 |
| C  | -1.31920000 | 0.96650000  | -1.09940000 |
| C  | -0.51700000 | -0.26730000 | -3.09160000 |
| C  | -0.52330000 | -0.02740000 | -1.69980000 |
| C  | -2.09380000 | 3.07060000  | 0.85380000  |
| C  | -1.57450000 | 1.29490000  | 3.01690000  |

|   |             |             |             |
|---|-------------|-------------|-------------|
| C | -3.03730000 | 0.39970000  | 0.90030000  |
| C | -1.04190000 | -2.17120000 | 1.14950000  |
| C | 0.41040000  | -0.89770000 | 3.12820000  |
| C | 1.90270000  | -2.17880000 | 1.15230000  |
| C | 3.01810000  | 0.52720000  | 2.11510000  |
| C | 2.96430000  | 3.39320000  | 1.43430000  |
| C | 1.15150000  | 2.36240000  | 3.11520000  |
| H | 0.39730000  | 2.28950000  | 0.29090000  |
| S | 0.61010000  | -1.55750000 | -3.46880000 |
| C | 0.98360000  | -1.68580000 | -1.78640000 |
| H | 1.70980000  | -2.40830000 | -1.43750000 |
| H | -2.78280000 | 2.46270000  | -1.62680000 |
| H | -2.79330000 | 2.03210000  | -4.02760000 |
| H | -1.33400000 | 0.27090000  | -5.03250000 |
| C | 1.42890000  | 2.37640000  | -0.83860000 |
| C | 2.40810000  | 1.55340000  | -0.73320000 |
| C | 3.54880000  | 0.94510000  | -1.42920000 |
| O | 3.51620000  | -0.12190000 | -2.00200000 |
| O | 4.63590000  | 1.72220000  | -1.29860000 |
| C | 5.87520000  | 1.22600000  | -1.88050000 |
| H | 6.43840000  | 2.13600000  | -2.10530000 |
| H | 5.63720000  | 0.70450000  | -2.81200000 |
| C | 6.61790000  | 0.32630000  | -0.90410000 |
| H | 6.04020000  | -0.57890000 | -0.68810000 |
| H | 7.57780000  | 0.02340000  | -1.34130000 |
| H | 6.81940000  | 0.85140000  | 0.03680000  |
| C | 0.83270000  | 3.44360000  | -1.66660000 |
| O | 0.14300000  | 4.33870000  | -1.23530000 |
| O | 1.19540000  | 3.28280000  | -2.94740000 |
| C | 0.67600000  | 4.26900000  | -3.87840000 |
| H | -0.41490000 | 4.29050000  | -3.78180000 |
| H | 1.06230000  | 5.25400000  | -3.59150000 |
| C | 1.12190000  | 3.85500000  | -5.26800000 |
| H | 0.72780000  | 2.86420000  | -5.52090000 |
| H | 0.74890000  | 4.57640000  | -6.00510000 |
| H | 2.21520000  | 3.82360000  | -5.33860000 |

---

### Species D

HF energy= -2626.92105742

No imaginary frequency

Zero-point correction= 0.355861 (Hartree/Particle)

Thermal correction to Energy= 0.402660

Thermal correction to Enthalpy= 0.403604

Thermal correction to Gibbs Free Energy= 0.269799

Sum of electronic and zero-point Energies= -2626.565196

Sum of electronic and thermal Energies= -2626.518398  
Sum of electronic and thermal Enthalpies= -2626.517454  
Sum of electronic and thermal Free Energies= -2626.651258

Coordinates: **D**

|    |             |             |             |
|----|-------------|-------------|-------------|
| Os | -1.48440000 | 0.53180000  | 2.07990000  |
| Os | 0.53360000  | -1.06310000 | 0.83840000  |
| Os | 0.76680000  | 1.84390000  | 0.92190000  |
| O  | -3.59470000 | 2.52990000  | 3.16840000  |
| O  | -1.20440000 | -0.89400000 | 4.81030000  |
| O  | -3.47980000 | -1.56180000 | 1.09800000  |
| O  | -0.80450000 | -3.84260000 | 0.98340000  |
| O  | 1.86090000  | -1.35050000 | 3.57910000  |
| O  | 3.14230000  | -2.10030000 | -0.44790000 |
| O  | 3.56900000  | 1.23180000  | 1.95970000  |
| O  | 0.92870000  | 4.95020000  | 0.93060000  |
| O  | 0.34290000  | 2.53660000  | 3.90840000  |
| N  | -0.49920000 | -0.54650000 | -1.02970000 |
| C  | -2.38810000 | 2.14150000  | -2.61310000 |
| C  | -2.62510000 | 2.98970000  | -1.52900000 |
| C  | -2.17820000 | 2.65610000  | -0.24210000 |
| C  | -1.46900000 | 1.46270000  | 0.04960000  |
| C  | -1.69490000 | 0.95230000  | -2.37240000 |
| C  | -1.24170000 | 0.63080000  | -1.08090000 |
| C  | -2.77290000 | 1.83440000  | 2.76070000  |
| C  | -1.29830000 | -0.36610000 | 3.79410000  |
| C  | -2.70650000 | -0.79470000 | 1.47560000  |
| C  | -0.32140000 | -2.79800000 | 0.92140000  |
| C  | 1.35460000  | -1.23760000 | 2.54950000  |
| C  | 2.16140000  | -1.65510000 | -0.03900000 |
| C  | 2.51780000  | 1.43790000  | 1.53330000  |
| C  | 0.81170000  | 3.80880000  | 0.88260000  |
| C  | 0.22360000  | 2.08320000  | 2.84570000  |
| H  | 0.14690000  | 3.51560000  | -1.68580000 |
| S  | -1.18210000 | -0.28090000 | -3.51110000 |
| C  | -0.39660000 | -1.10550000 | -2.20640000 |
| H  | 0.16820000  | -2.01470000 | -2.37690000 |
| H  | -2.39040000 | 3.34940000  | 0.56860000  |
| H  | -3.15570000 | 3.92510000  | -1.69080000 |
| H  | -2.71350000 | 2.40960000  | -3.61410000 |
| C  | 1.00670000  | 2.91610000  | -1.97420000 |
| C  | 1.58000000  | 2.06630000  | -1.09540000 |
| C  | 2.69250000  | 1.19030000  | -1.58120000 |
| O  | 2.53960000  | 0.23430000  | -2.31740000 |
| O  | 3.87920000  | 1.56700000  | -1.07960000 |
| C  | 5.03880000  | 0.79880000  | -1.48870000 |

|   |            |             |             |
|---|------------|-------------|-------------|
| H | 5.11320000 | 0.84540000  | -2.58140000 |
| H | 4.88630000 | -0.24750000 | -1.20470000 |
| C | 6.24930000 | 1.40880000  | -0.80560000 |
| H | 6.14620000 | 1.36130000  | 0.28430000  |
| H | 7.15360000 | 0.85800000  | -1.09290000 |
| H | 6.37610000 | 2.45810000  | -1.09660000 |
| C | 1.28300000 | 3.03960000  | -3.43180000 |
| O | 0.40550000 | 3.26980000  | -4.24220000 |
| O | 2.57910000 | 2.88910000  | -3.76360000 |
| C | 2.87620000 | 2.91990000  | -5.17820000 |
| H | 2.30100000 | 2.12900000  | -5.67400000 |
| H | 2.53970000 | 3.88060000  | -5.58520000 |
| C | 4.37270000 | 2.72340000  | -5.33890000 |
| H | 4.68400000 | 1.75240000  | -4.93640000 |
| H | 4.63970000 | 2.75640000  | -6.40230000 |
| H | 4.92980000 | 3.51140000  | -4.81880000 |

---

### Species TSDE

HF energy= -2626.91009662

Imaginary frequency= 60i

Zero-point correction= 0.355713 (Hartree/Particle)

Thermal correction to Energy= 0.401559

Thermal correction to Enthalpy= 0.402503

Thermal correction to Gibbs Free Energy= 0.271868

Sum of electronic and zero-point Energies= -2626.554384

Sum of electronic and thermal Energies= -2626.508538

Sum of electronic and thermal Enthalpies= -2626.507594

Sum of electronic and thermal Free Energies= -2626.638229

### Coordinates: TSDE

|    |             |             |             |
|----|-------------|-------------|-------------|
| Os | -1.29840000 | 0.26880000  | 1.99340000  |
| Os | 0.41710000  | -0.88490000 | -0.16630000 |
| Os | 0.81750000  | 1.78420000  | 0.94950000  |
| O  | -3.27230000 | 1.69830000  | 3.88240000  |
| O  | -0.24830000 | -1.68060000 | 4.13610000  |
| O  | -3.54130000 | -1.56710000 | 0.94390000  |
| O  | -0.96020000 | -3.54210000 | 0.45300000  |
| O  | 2.69400000  | -1.64840000 | 1.73460000  |
| O  | 1.74800000  | -2.13480000 | -2.66660000 |
| O  | 3.58930000  | 1.60540000  | 2.18120000  |
| O  | 1.25160000  | 4.73390000  | 0.24740000  |
| O  | 0.16010000  | 2.48910000  | 3.85910000  |
| N  | -1.21990000 | -0.05820000 | -1.38990000 |
| C  | -3.27980000 | 2.93860000  | -1.73290000 |
| C  | -3.01960000 | 3.58290000  | -0.52660000 |

|   |             |             |             |
|---|-------------|-------------|-------------|
| C | -2.19890000 | 2.98930000  | 0.45390000  |
| C | -1.57170000 | 1.73810000  | 0.27480000  |
| C | -2.66520000 | 1.69740000  | -1.95240000 |
| C | -1.80810000 | 1.14070000  | -0.98890000 |
| C | -2.52450000 | 1.17860000  | 3.17980000  |
| C | -0.66070000 | -0.95830000 | 3.34120000  |
| C | -2.65160000 | -0.92150000 | 1.29140000  |
| C | -0.47950000 | -2.51890000 | 0.22960000  |
| C | 1.84900000  | -1.34410000 | 1.01990000  |
| C | 1.30700000  | -1.62090000 | -1.74050000 |
| C | 2.55660000  | 1.67510000  | 1.67240000  |
| C | 1.11750000  | 3.62430000  | 0.52180000  |
| C | 0.09360000  | 1.99040000  | 2.79710000  |
| H | 0.06700000  | 2.01970000  | -2.27930000 |
| S | -2.75300000 | 0.64110000  | -3.35090000 |
| C | -1.62990000 | -0.42380000 | -2.57750000 |
| H | -1.28030000 | -1.32330000 | -3.07220000 |
| H | -2.06450000 | 3.51690000  | 1.39560000  |
| H | -3.47100000 | 4.55310000  | -0.33210000 |
| H | -3.92610000 | 3.38830000  | -2.48200000 |
| C | 1.11320000  | 1.73360000  | -2.26400000 |
| C | 1.66070000  | 1.21910000  | -1.12300000 |
| C | 3.14250000  | 0.92970000  | -1.10760000 |
| O | 3.64940000  | -0.17340000 | -1.15140000 |
| O | 3.85600000  | 2.06030000  | -0.94620000 |
| C | 5.29370000  | 1.90570000  | -0.87170000 |
| H | 5.63790000  | 1.43180000  | -1.79760000 |
| H | 5.53130000  | 1.23320000  | -0.03960000 |
| C | 5.88980000  | 3.28800000  | -0.67610000 |
| H | 5.53100000  | 3.74090000  | 0.25550000  |
| H | 6.98330000  | 3.21590000  | -0.62400000 |
| H | 5.62510000  | 3.95120000  | -1.50790000 |
| C | 1.71570000  | 1.97050000  | -3.59000000 |
| O | 1.07980000  | 2.43480000  | -4.52060000 |
| O | 3.01030000  | 1.59210000  | -3.70560000 |
| C | 3.59740000  | 1.75810000  | -5.01330000 |
| H | 2.99560000  | 1.20160000  | -5.74200000 |
| H | 3.55030000  | 2.81800000  | -5.29080000 |
| C | 5.02540000  | 1.24610000  | -4.95000000 |
| H | 5.05060000  | 0.19560000  | -4.63810000 |
| H | 5.49330000  | 1.32640000  | -5.93910000 |
| H | 5.62310000  | 1.83180000  | -4.24150000 |

---

**Species E**

HF energy= -2626.91965442

No imaginary frequency  
 Zero-point correction= 0.356498 (Hartree/Particle)  
 Thermal correction to Energy= 0.402637  
 Thermal correction to Enthalpy= 0.403582  
 Thermal correction to Gibbs Free Energy= 0.272179  
 Sum of electronic and zero-point Energies= -2626.563157  
 Sum of electronic and thermal Energies= -2626.517017  
 Sum of electronic and thermal Enthalpies= -2626.516073  
 Sum of electronic and thermal Free Energies= -2626.647475

Coordinates: E

|    |              |             |             |
|----|--------------|-------------|-------------|
| Os | -9.74900000  | 10.20540000 | 8.53870000  |
| Os | -12.74940000 | 10.40100000 | 7.61500000  |
| Os | -11.90470000 | 8.18470000  | 9.36280000  |
| S  | -10.94620000 | 13.13290000 | 12.07280000 |
| O  | -9.08140000  | 8.23780000  | 6.27720000  |
| O  | -6.80850000  | 10.84840000 | 9.19660000  |
| O  | -12.62910000 | 13.52730000 | 7.78260000  |
| O  | -15.78140000 | 10.53940000 | 7.20910000  |
| O  | -9.73070000  | 12.49660000 | 6.43920000  |
| O  | -12.18860000 | 10.24050000 | 4.60200000  |
| O  | -13.57480000 | 7.48180000  | 6.96070000  |
| O  | -13.95460000 | 6.75590000  | 11.09840000 |
| O  | -11.09910000 | 5.36250000  | 8.51300000  |
| O  | -8.59900000  | 6.79890000  | 9.02010000  |
| O  | -7.56940000  | 7.95890000  | 10.66550000 |
| O  | -10.77880000 | 7.93950000  | 13.50110000 |
| O  | -9.67420000  | 6.50850000  | 12.14160000 |
| N  | -10.61510000 | 11.48130000 | 10.11410000 |
| C  | -9.32380000  | 8.94120000  | 7.14850000  |
| C  | -7.91240000  | 10.59560000 | 8.99780000  |
| C  | -12.54930000 | 12.37890000 | 7.77600000  |
| C  | -14.64150000 | 10.48670000 | 7.35560000  |
| C  | -9.81770000  | 11.63920000 | 7.20100000  |
| C  | -12.41320000 | 10.31380000 | 5.72750000  |
| C  | -13.01670000 | 8.26400000  | 7.66540000  |
| C  | -13.17460000 | 7.27850000  | 10.42490000 |
| C  | -11.29160000 | 6.43990000  | 8.85860000  |
| C  | -10.01070000 | 12.41110000 | 10.81020000 |
| H  | -8.98460000  | 12.71110000 | 10.63070000 |
| C  | -11.92990000 | 11.27440000 | 10.55040000 |
| C  | -12.28820000 | 12.09020000 | 11.63560000 |
| C  | -13.56480000 | 12.01160000 | 12.21620000 |
| H  | -13.84050000 | 12.63710000 | 13.06090000 |
| C  | -14.45950000 | 11.10100000 | 11.66710000 |
| H  | -15.45710000 | 11.00980000 | 12.09100000 |

|   |              |             |             |
|---|--------------|-------------|-------------|
| C | -14.10090000 | 10.30220000 | 10.56060000 |
| H | -14.85290000 | 9.62800000  | 10.15740000 |
| C | -12.82950000 | 10.34640000 | 9.95010000  |
| C | -6.46380000  | 5.89300000  | 11.40670000 |
| H | -5.52730000  | 5.32630000  | 11.32340000 |
| H | -6.61260000  | 6.16990000  | 12.45620000 |
| H | -7.29300000  | 5.24900000  | 11.09950000 |
| C | -6.38430000  | 7.13020000  | 10.52440000 |
| H | -6.27050000  | 6.86210000  | 9.46950000  |
| H | -5.56420000  | 7.79070000  | 10.82210000 |
| C | -8.62120000  | 7.65580000  | 9.87640000  |
| C | -9.72440000  | 8.66710000  | 10.09970000 |
| C | -10.37020000 | 8.66930000  | 11.32500000 |
| H | -10.93600000 | 9.51570000  | 11.68610000 |
| C | -10.20840000 | 7.58300000  | 12.32670000 |
| C | -10.73500000 | 6.94800000  | 14.55270000 |
| H | -11.22940000 | 6.03670000  | 14.19630000 |
| H | -9.68680000  | 6.69910000  | 14.75700000 |
| C | -11.42930000 | 7.53720000  | 15.76750000 |
| H | -12.47450000 | 7.77920000  | 15.54190000 |
| H | -11.41360000 | 6.81350000  | 16.59160000 |
| H | -10.92560000 | 8.45160000  | 16.10250000 |

---

### Species TSEF

HF energy= -2626.91657397

Imaginary frequency= 26i

Zero-point correction= 0.356731 (Hartree/Particle)

Thermal correction to Energy= 0.401866

Thermal correction to Enthalpy= 0.402810

Thermal correction to Gibbs Free Energy= 0.275047

Sum of electronic and zero-point Energies= -2626.559843

Sum of electronic and thermal Energies= -2626.514708

Sum of electronic and thermal Enthalpies= -2626.513764

Sum of electronic and thermal Free Energies= -2626.641527

### Coordinates: TSEF

|    |              |             |             |
|----|--------------|-------------|-------------|
| Os | -9.64550000  | 10.47680000 | 8.66470000  |
| Os | -12.51700000 | 10.21810000 | 7.62130000  |
| Os | -12.10950000 | 8.11890000  | 9.60090000  |
| S  | -11.18950000 | 13.09740000 | 12.28780000 |
| O  | -8.70570000  | 8.69740000  | 6.34720000  |
| O  | -6.81420000  | 11.02420000 | 9.74660000  |
| O  | -12.39960000 | 13.29920000 | 7.41640000  |
| O  | -15.48060000 | 10.34730000 | 6.80250000  |
| O  | -9.35560000  | 12.92370000 | 6.77260000  |

|   |              |             |             |
|---|--------------|-------------|-------------|
| O | -11.54840000 | 9.57820000  | 4.76020000  |
| O | -13.78740000 | 7.31230000  | 7.22450000  |
| O | -14.10920000 | 7.01140000  | 11.60910000 |
| O | -11.32740000 | 5.20360000  | 9.22080000  |
| O | -8.92470000  | 6.86430000  | 8.85330000  |
| O | -7.66570000  | 7.92540000  | 10.40390000 |
| O | -10.70170000 | 7.98660000  | 13.48700000 |
| O | -9.70830000  | 6.55390000  | 12.04740000 |
| N | -10.70360000 | 11.62100000 | 10.22200000 |
| C | -9.06080000  | 9.33310000  | 7.23290000  |
| C | -7.88190000  | 10.78950000 | 9.38670000  |
| C | -12.34290000 | 12.15050000 | 7.49920000  |
| C | -14.38020000 | 10.25940000 | 7.12660000  |
| C | -9.52220000  | 12.01740000 | 7.45910000  |
| C | -11.91480000 | 9.82470000  | 5.82190000  |
| C | -13.14370000 | 8.02720000  | 7.91310000  |
| C | -13.33520000 | 7.41560000  | 10.85150000 |
| C | -11.53790000 | 6.32140000  | 9.37890000  |
| C | -10.16340000 | 12.49440000 | 11.03480000 |
| H | -9.13230000  | 12.81790000 | 10.95040000 |
| C | -12.04330000 | 11.36470000 | 10.54700000 |
| C | -12.47850000 | 12.07570000 | 11.68010000 |
| C | -13.77860000 | 11.92580000 | 12.18820000 |
| H | -14.10610000 | 12.47350000 | 13.06790000 |
| C | -14.62740000 | 11.05240000 | 11.52250000 |
| H | -15.64110000 | 10.90450000 | 11.88760000 |
| C | -14.20030000 | 10.36960000 | 10.36350000 |
| H | -14.92260000 | 9.73550000  | 9.85560000  |
| C | -12.90290000 | 10.49040000 | 9.81740000  |
| C | -6.62470000  | 5.78180000  | 11.00880000 |
| H | -5.73620000  | 5.16240000  | 10.82880000 |
| H | -6.65500000  | 6.04910000  | 12.07080000 |
| H | -7.51680000  | 5.19320000  | 10.77590000 |
| C | -6.55490000  | 7.02710000  | 10.13730000 |
| H | -6.56220000  | 6.77130000  | 9.07320000  |
| H | -5.66950000  | 7.63030000  | 10.36050000 |
| C | -8.80600000  | 7.70950000  | 9.71540000  |
| C | -9.81400000  | 8.78410000  | 10.04980000 |
| C | -10.42670000 | 8.73480000  | 11.29460000 |
| H | -10.92720000 | 9.59670000  | 11.71790000 |
| C | -10.21940000 | 7.63120000  | 12.27390000 |
| C | -10.59190000 | 6.98950000  | 14.52930000 |
| H | -11.12360000 | 6.08640000  | 14.20770000 |
| H | -9.53450000  | 6.72710000  | 14.65310000 |
| C | -11.18560000 | 7.58190000  | 15.79470000 |
| H | -12.24160000 | 7.83790000  | 15.64910000 |



|   |              |            |             |
|---|--------------|------------|-------------|
| H | -11.11740000 | 6.85400000 | 16.61240000 |
| H | -10.64630000 | 8.48820000 | 16.09460000 |

---

**Species F**

HF energy= -2626.92888614

No imaginary frequency

Zero-point correction= 0.357285 (Hartree/Particle)

Thermal correction to Energy= 0.403030

Thermal correction to Enthalpy= 0.403974

Thermal correction to Gibbs Free Energy= 0.273591

Sum of electronic and zero-point Energies= -2626.571601

Sum of electronic and thermal Energies= -2626.525856

Sum of electronic and thermal Enthalpies= -2626.524912

Sum of electronic and thermal Free Energies= -2626.655295

**Coordinates: F**

|    |              |             |             |
|----|--------------|-------------|-------------|
| Os | -9.35400000  | 10.95300000 | 9.22020000  |
| Os | -11.67460000 | 9.71840000  | 7.97740000  |
| Os | -12.80950000 | 8.10890000  | 10.11920000 |
| S  | -11.88470000 | 13.07580000 | 12.60770000 |
| O  | -7.47100000  | 9.96610000  | 7.02330000  |
| O  | -7.16270000  | 10.73940000 | 11.36770000 |
| O  | -11.50260000 | 12.41930000 | 6.51490000  |
| O  | -14.20920000 | 9.01560000  | 6.38760000  |
| O  | -8.99760000  | 13.89990000 | 8.24200000  |
| O  | -10.15030000 | 8.14740000  | 5.76860000  |
| O  | -15.40460000 | 7.17130000  | 8.68030000  |
| O  | -13.95090000 | 7.67670000  | 12.94410000 |
| O  | -11.95070000 | 5.20510000  | 9.83240000  |
| O  | -9.73920000  | 6.85710000  | 8.50300000  |
| O  | -8.03790000  | 7.91750000  | 9.53190000  |
| O  | -10.50470000 | 8.09420000  | 13.17990000 |
| O  | -9.76190000  | 6.64810000  | 11.61730000 |
| N  | -10.84040000 | 11.74840000 | 10.65510000 |
| C  | -8.18150000  | 10.31520000 | 7.85830000  |
| C  | -7.98470000  | 10.83050000 | 10.56570000 |
| C  | -11.45960000 | 11.42320000 | 7.10010000  |
| C  | -13.27510000 | 9.24090000  | 7.02890000  |
| C  | -9.14430000  | 12.80730000 | 8.57320000  |
| C  | -10.67440000 | 8.70480000  | 6.62300000  |
| C  | -14.43690000 | 7.57550000  | 9.15110000  |
| C  | -13.50430000 | 7.83070000  | 11.89440000 |
| C  | -12.21370000 | 6.31560000  | 9.94080000  |
| C  | -10.55060000 | 12.56640000 | 11.63570000 |
| H  | -9.54290000  | 12.91180000 | 11.83540000 |

|   |              |             |             |
|---|--------------|-------------|-------------|
| C | -12.20650000 | 11.45670000 | 10.60180000 |
| C | -12.94140000 | 12.09910000 | 11.61240000 |
| C | -14.33410000 | 11.94020000 | 11.74010000 |
| H | -14.88990000 | 12.44000000 | 12.52870000 |
| C | -14.95840000 | 11.13690000 | 10.80870000 |
| H | -16.03710000 | 11.00110000 | 10.84360000 |
| C | -14.21810000 | 10.50510000 | 9.77060000  |
| H | -14.80040000 | 10.02350000 | 8.99270000  |
| C | -12.81190000 | 10.60980000 | 9.61650000  |
| C | -6.98250000  | 5.79840000  | 10.20700000 |
| H | -6.23190000  | 5.06160000  | 9.89140000  |
| H | -6.65560000  | 6.24230000  | 11.15440000 |
| H | -7.93380000  | 5.28760000  | 10.37710000 |
| C | -7.12270000  | 6.86300000  | 9.12960000  |
| H | -7.47970000  | 6.43630000  | 8.18820000  |
| H | -6.17670000  | 7.38620000  | 8.95560000  |
| C | -9.33480000  | 7.78970000  | 9.16540000  |
| C | -10.15810000 | 8.98850000  | 9.63730000  |
| C | -10.83680000 | 8.72960000  | 10.94900000 |
| H | -11.01660000 | 9.62570000  | 11.53250000 |
| C | -10.29060000 | 7.70670000  | 11.89250000 |
| C | -10.11360000 | 7.14760000  | 14.19910000 |
| H | -10.63190000 | 6.19810000  | 14.01840000 |
| H | -9.03730000  | 6.95890000  | 14.11070000 |
| C | -10.47900000 | 7.74550000  | 15.54620000 |
| H | -11.55830000 | 7.92580000  | 15.61440000 |
| H | -10.19330000 | 7.05500000  | 16.34930000 |
| H | -9.95730000  | 8.69620000  | 15.70870000 |

---

### Species TSFG

HF energy= -2626.92472741

Imaginary frequency= 73i

Zero-point correction= 0.356604 (Hartree/Particle)

Thermal correction to Energy= 0.401714

Thermal correction to Enthalpy= 0.402658

Thermal correction to Gibbs Free Energy= 0.274383

Sum of electronic and zero-point Energies= -2626.568123

Sum of electronic and thermal Energies= -2626.523013

Sum of electronic and thermal Enthalpies= -2626.522069

Sum of electronic and thermal Free Energies= -2626.650345

### Coordinates: TSFG

|    |              |             |             |
|----|--------------|-------------|-------------|
| Os | -9.27530000  | 10.84280000 | 9.44740000  |
| Os | -11.55510000 | 9.68930000  | 8.07700000  |
| Os | -12.67490000 | 7.94040000  | 10.18110000 |

|   |              |             |             |
|---|--------------|-------------|-------------|
| S | -11.95310000 | 13.16300000 | 12.59160000 |
| O | -7.31350000  | 9.89570000  | 7.30260000  |
| O | -7.18760000  | 10.53620000 | 11.68660000 |
| O | -11.23130000 | 12.39740000 | 6.65440000  |
| O | -14.00310000 | 9.10510000  | 6.31850000  |
| O | -8.76770000  | 13.78030000 | 8.51130000  |
| O | -9.90870000  | 8.03730000  | 6.03000000  |
| O | -14.98620000 | 6.96100000  | 8.32440000  |
| O | -14.38290000 | 8.14080000  | 12.69690000 |
| O | -12.09870000 | 5.02830000  | 10.78640000 |
| O | -10.17410000 | 6.59580000  | 9.17120000  |
| O | -8.19840000  | 7.65770000  | 9.25360000  |
| O | -10.84740000 | 7.93320000  | 13.36750000 |
| O | -9.30600000  | 7.01810000  | 11.99760000 |
| N | -10.83440000 | 11.69360000 | 10.78340000 |
| C | -8.05490000  | 10.20540000 | 8.12620000  |
| C | -7.97370000  | 10.66340000 | 10.85370000 |
| C | -11.25470000 | 11.40180000 | 7.24110000  |
| C | -13.10560000 | 9.27060000  | 7.02790000  |
| C | -8.97160000  | 12.69320000 | 8.82990000  |
| C | -10.49210000 | 8.65750000  | 6.80210000  |
| C | -14.11890000 | 7.37770000  | 8.95010000  |
| C | -13.71630000 | 8.01200000  | 11.76540000 |
| C | -12.28430000 | 6.13610000  | 10.54570000 |
| C | -10.57800000 | 12.52660000 | 11.75990000 |
| H | -9.57040000  | 12.81610000 | 12.03530000 |
| C | -12.21170000 | 11.48370000 | 10.61920000 |
| C | -12.98770000 | 12.22060000 | 11.53680000 |
| C | -14.38850000 | 12.16830000 | 11.53390000 |
| H | -14.97850000 | 12.74080000 | 12.24430000 |
| C | -14.98330000 | 11.36170000 | 10.57580000 |
| H | -16.06800000 | 11.29820000 | 10.52260000 |
| C | -14.20420000 | 10.62360000 | 9.65730000  |
| H | -14.74260000 | 10.05340000 | 8.90550000  |
| C | -12.79030000 | 10.63030000 | 9.63440000  |
| C | -6.04900000  | 6.67300000  | 8.87380000  |
| H | -5.51650000  | 5.74230000  | 8.64210000  |
| H | -5.81530000  | 7.40670000  | 8.09370000  |
| H | -5.67810000  | 7.05200000  | 9.83330000  |
| C | -7.54080000  | 6.40190000  | 8.93980000  |
| H | -7.79970000  | 5.68550000  | 9.72610000  |
| H | -7.93730000  | 6.02920000  | 7.98880000  |
| C | -9.52670000  | 7.60710000  | 9.39930000  |
| C | -10.15920000 | 8.91150000  | 9.84410000  |
| C | -10.85780000 | 8.68660000  | 11.14410000 |
| H | -11.14060000 | 9.59740000  | 11.66380000 |

|   |              |            |             |
|---|--------------|------------|-------------|
| C | -10.23440000 | 7.78380000 | 12.16290000 |
| C | -10.35680000 | 7.09650000 | 14.43840000 |
| H | -10.47590000 | 6.04560000 | 14.14770000 |
| H | -9.28470000  | 7.28360000 | 14.57140000 |
| C | -11.15450000 | 7.43340000 | 15.68590000 |
| H | -12.22350000 | 7.24590000 | 15.53110000 |
| H | -10.81320000 | 6.81340000 | 16.52410000 |
| H | -11.02530000 | 8.48670000 | 15.96180000 |

---

### Species G

HF energy= -2626.96316339

No imaginary frequency

Zero-point correction= 0.358017 (Hartree/Particle)

Thermal correction to Energy= 0.403370

Thermal correction to Enthalpy= 0.404315

Thermal correction to Gibbs Free Energy= 0.275351

Sum of electronic and zero-point Energies= -2626.605146

Sum of electronic and thermal Energies= -2626.559793

Sum of electronic and thermal Enthalpies= -2626.558849

Sum of electronic and thermal Free Energies= -2626.687812

### Coordinates: G

|    |              |             |             |
|----|--------------|-------------|-------------|
| Os | -8.78210000  | 9.73070000  | 10.21180000 |
| Os | -10.56450000 | 10.48560000 | 8.15380000  |
| Os | -12.76650000 | 8.55150000  | 8.22470000  |
| S  | -11.18880000 | 11.74960000 | 13.64880000 |
| O  | -6.81760000  | 8.70360000  | 8.14030000  |
| O  | -7.94790000  | 7.52450000  | 12.12020000 |
| O  | -6.79880000  | 12.01780000 | 10.79700000 |
| O  | -8.42740000  | 12.64410000 | 8.09290000  |
| O  | -12.21520000 | 11.96000000 | 6.06260000  |
| O  | -9.36120000  | 8.86480000  | 5.82570000  |
| O  | -13.24620000 | 9.02530000  | 5.21340000  |
| O  | -14.87300000 | 10.49950000 | 9.15610000  |
| O  | -14.82030000 | 6.35540000  | 8.67450000  |
| O  | -11.21630000 | 7.09010000  | 7.87900000  |
| O  | -9.09490000  | 6.90100000  | 8.54640000  |
| O  | -13.10810000 | 6.95890000  | 11.43360000 |
| O  | -11.12320000 | 6.19890000  | 10.73800000 |
| N  | -10.14280000 | 10.70780000 | 11.56550000 |
| C  | -7.58390000  | 9.04450000  | 8.91780000  |
| C  | -8.27100000  | 8.38650000  | 11.45020000 |
| C  | -7.50790000  | 11.15730000 | 10.58300000 |
| C  | -9.19540000  | 11.81140000 | 8.19540000  |
| C  | -11.64720000 | 11.40820000 | 6.87600000  |

|   |              |             |             |
|---|--------------|-------------|-------------|
| C | -9.78840000  | 9.46930000  | 6.70050000  |
| C | -13.09770000 | 8.83200000  | 6.31880000  |
| C | -14.05660000 | 9.80170000  | 8.77310000  |
| C | -14.03060000 | 7.15940000  | 8.50280000  |
| C | -10.02640000 | 10.75960000 | 12.85410000 |
| H | -9.36460000  | 10.29620000 | 13.31530000 |
| C | -11.20490000 | 11.48050000 | 11.07620000 |
| C | -11.88830000 | 12.16190000 | 12.10610000 |
| C | -12.95470000 | 13.02520000 | 11.83710000 |
| H | -13.42550000 | 13.45670000 | 12.51470000 |
| C | -13.26030000 | 13.19450000 | 10.52280000 |
| H | -13.93480000 | 13.79320000 | 10.29350000 |
| C | -12.59870000 | 12.50430000 | 9.49940000  |
| H | -12.86790000 | 12.66060000 | 8.62320000  |
| C | -11.55640000 | 11.59290000 | 9.71330000  |
| C | -9.13120000  | 4.46880000  | 8.37980000  |
| H | -9.06720000  | 3.73150000  | 7.76880000  |
| H | -8.45690000  | 4.38340000  | 9.05750000  |
| H | -9.99890000  | 4.46960000  | 8.79100000  |
| C | -8.93140000  | 5.75130000  | 7.63560000  |
| H | -9.57790000  | 5.81250000  | 6.91450000  |
| H | -8.04320000  | 5.76660000  | 7.24750000  |
| C | -10.26190000 | 7.46860000  | 8.59120000  |
| C | -10.44680000 | 8.65430000  | 9.47630000  |
| C | -11.78680000 | 8.40030000  | 10.16030000 |
| H | -12.04030000 | 9.12960000  | 10.76370000 |
| C | -11.93300000 | 7.08500000  | 10.78800000 |
| C | -13.38090000 | 5.67370000  | 12.04590000 |
| H | -13.53040000 | 5.00510000  | 11.35930000 |
| H | -12.62200000 | 5.39460000  | 12.58260000 |
| C | -14.56140000 | 5.79750000  | 12.88360000 |
| H | -15.31860000 | 6.02460000  | 12.33790000 |
| H | -14.72770000 | 4.96320000  | 13.32810000 |
| H | -14.41980000 | 6.48640000  | 13.53690000 |

---

### Species TSDH

HF energy= -2626.90191667

Imaginary frequency=  $62i$

Zero-point correction= 0.355826 (Hartree/Particle)

Thermal correction to Energy= 0.401833

Thermal correction to Enthalpy= 0.402777

Thermal correction to Gibbs Free Energy= 0.270289

Sum of electronic and zero-point Energies= -2626.546090

Sum of electronic and thermal Energies= -2626.500084

Sum of electronic and thermal Enthalpies= -2626.499140

Sum of electronic and thermal Free Energies= -2626.631628

Coordinates: **TSDH**

|    |             |             |             |
|----|-------------|-------------|-------------|
| Os | -1.62430000 | 0.65200000  | 1.96440000  |
| Os | 0.37810000  | -1.35390000 | 1.22520000  |
| Os | 0.79020000  | 1.58250000  | 0.97130000  |
| O  | -2.84090000 | 3.36990000  | 2.68650000  |
| O  | -1.27740000 | -0.03110000 | 4.97380000  |
| O  | -4.35110000 | -0.72550000 | 1.63110000  |
| O  | -2.06190000 | -3.13660000 | 1.81110000  |
| O  | 1.41280000  | -1.65030000 | 4.09770000  |
| O  | 2.25470000  | -3.62340000 | 0.27980000  |
| O  | 3.32040000  | -0.16600000 | 0.81500000  |
| O  | 0.19820000  | 4.58510000  | 1.35000000  |
| O  | 1.97610000  | 1.90400000  | 3.74410000  |
| N  | -0.29230000 | -0.98840000 | -0.83230000 |
| C  | -1.84610000 | 1.46130000  | -3.05040000 |
| C  | -2.36130000 | 2.37770000  | -2.13250000 |
| C  | -2.21790000 | 2.17960000  | -0.75370000 |
| C  | -1.55280000 | 1.06580000  | -0.18110000 |
| C  | -1.17920000 | 0.35110000  | -2.53600000 |
| C  | -1.01910000 | 0.16660000  | -1.14340000 |
| C  | -2.38260000 | 2.35230000  | 2.39520000  |
| C  | -1.39640000 | 0.22290000  | 3.85840000  |
| C  | -3.32180000 | -0.23330000 | 1.78940000  |
| C  | -1.21290000 | -2.38630000 | 1.60000000  |
| C  | 1.00920000  | -1.52840000 | 3.02990000  |
| C  | 1.58550000  | -2.74880000 | 0.61220000  |
| C  | 2.17880000  | 0.07870000  | 0.83080000  |
| C  | 0.37170000  | 3.46550000  | 1.17540000  |
| C  | 1.48980000  | 1.74920000  | 2.70550000  |
| H  | 0.21860000  | 3.80590000  | -1.31480000 |
| S  | -0.42700000 | -0.96870000 | -3.41000000 |
| C  | 0.06460000  | -1.64810000 | -1.90420000 |
| H  | 0.65480000  | -2.55580000 | -1.87030000 |
| H  | -2.65860000 | 2.92480000  | -0.09590000 |
| H  | -2.88160000 | 3.26060000  | -2.49660000 |
| H  | -1.95850000 | 1.61190000  | -4.12060000 |
| C  | 1.07140000  | 3.24970000  | -1.69370000 |
| C  | 1.64320000  | 2.26030000  | -0.96820000 |
| C  | 2.76540000  | 1.46220000  | -1.54900000 |
| O  | 2.60960000  | 0.39680000  | -2.11960000 |
| O  | 3.96330000  | 1.99690000  | -1.27750000 |
| C  | 5.11990000  | 1.24950000  | -1.72140000 |
| H  | 5.07860000  | 1.16310000  | -2.81350000 |
| H  | 5.06880000  | 0.24070000  | -1.29810000 |

|   |            |            |             |
|---|------------|------------|-------------|
| C | 6.35220000 | 2.00340000 | -1.25450000 |
| H | 6.36970000 | 2.08160000 | -0.16140000 |
| H | 7.25720000 | 1.47420000 | -1.57790000 |
| H | 6.37480000 | 3.01630000 | -1.67350000 |
| C | 1.38710000 | 3.70330000 | -3.07490000 |
| O | 0.69340000 | 4.50530000 | -3.66910000 |
| O | 2.49420000 | 3.14780000 | -3.61110000 |
| C | 2.80780000 | 3.54850000 | -4.96200000 |
| H | 1.95320000 | 3.31200000 | -5.60760000 |
| H | 2.94430000 | 4.63630000 | -4.98410000 |
| C | 4.06280000 | 2.80600000 | -5.38450000 |
| H | 3.90910000 | 1.72150000 | -5.33770000 |
| H | 4.32560000 | 3.07490000 | -6.41500000 |
| H | 4.90800000 | 3.06540000 | -4.73610000 |

---

### Species H

HF energy= -2626.92540907

No imaginary frequency

Zero-point correction= 0.356193 (Hartree/Particle)

Thermal correction to Energy= 0.402974

Thermal correction to Enthalpy= 0.403918

Thermal correction to Gibbs Free Energy= 0.268459

Sum of electronic and zero-point Energies= -2626.569216

Sum of electronic and thermal Energies= -2626.522435

Sum of electronic and thermal Enthalpies= -2626.521491

Sum of electronic and thermal Free Energies= -2626.656950

### Coordinates: H

|    |             |             |             |
|----|-------------|-------------|-------------|
| Os | -1.66750000 | 0.48680000  | 1.79420000  |
| Os | 0.65980000  | -0.96190000 | 0.97080000  |
| Os | 0.64870000  | 1.97750000  | 1.30590000  |
| O  | -4.12580000 | 2.26910000  | 2.41000000  |
| O  | -1.68830000 | -0.82300000 | 4.58720000  |
| O  | -3.40060000 | -1.66260000 | 0.48070000  |
| O  | -0.74820000 | -3.66920000 | 1.28510000  |
| O  | 1.65050000  | -0.97360000 | 3.86790000  |
| O  | 3.30310000  | -2.18240000 | -0.09530000 |
| O  | 2.86620000  | 1.08470000  | -0.69400000 |
| O  | -1.01610000 | 3.35970000  | 3.53200000  |
| O  | 2.91840000  | 2.43600000  | 3.27900000  |
| N  | -0.11290000 | -0.53040000 | -1.04950000 |
| C  | -1.82410000 | 2.06320000  | -2.96660000 |
| C  | -2.20170000 | 2.94260000  | -1.95500000 |
| C  | -1.92370000 | 2.66080000  | -0.60630000 |
| C  | -1.24360000 | 1.49740000  | -0.18690000 |

|   |             |             |             |
|---|-------------|-------------|-------------|
| C | -1.13610000 | 0.90270000  | -2.59460000 |
| C | -0.83770000 | 0.64530000  | -1.24650000 |
| C | -3.18840000 | 1.64390000  | 2.17960000  |
| C | -1.68060000 | -0.34350000 | 3.54160000  |
| C | -2.73930000 | -0.87070000 | 0.99540000  |
| C | -0.24270000 | -2.64250000 | 1.15320000  |
| C | 1.26790000  | -0.95880000 | 2.78250000  |
| C | 2.32540000  | -1.70400000 | 0.27830000  |
| C | 1.98680000  | 1.23550000  | 0.04490000  |
| C | -0.57010000 | 2.71420000  | 2.67880000  |
| C | 2.06600000  | 2.26590000  | 2.52330000  |
| H | -0.18670000 | 5.08060000  | 1.91710000  |
| S | -0.50750000 | -0.39220000 | -3.60100000 |
| C | 0.11500000  | -1.15500000 | -2.17730000 |
| H | 0.66830000  | -2.08600000 | -2.23340000 |
| H | -2.25120000 | 3.37960000  | 0.14060000  |
| H | -2.72070000 | 3.86220000  | -2.21400000 |
| H | -2.04380000 | 2.27950000  | -4.00870000 |
| C | 0.38720000  | 5.09280000  | 0.99480000  |
| C | 0.91800000  | 3.96160000  | 0.48340000  |
| C | 1.70260000  | 3.98490000  | -0.79300000 |
| O | 1.25080000  | 3.71230000  | -1.88680000 |
| O | 3.00650000  | 4.23450000  | -0.56320000 |
| C | 3.87470000  | 4.22180000  | -1.71920000 |
| H | 3.52580000  | 4.98670000  | -2.42270000 |
| H | 3.79320000  | 3.24640000  | -2.21130000 |
| C | 5.28560000  | 4.49710000  | -1.22990000 |
| H | 5.61260000  | 3.72280000  | -0.52600000 |
| H | 5.97990000  | 4.50650000  | -2.07940000 |
| H | 5.34280000  | 5.46820000  | -0.72460000 |
| C | 0.44060000  | 6.47070000  | 0.44330000  |
| O | -0.13540000 | 7.40510000  | 0.96360000  |
| O | 1.16930000  | 6.59700000  | -0.68970000 |
| C | 1.20590000  | 7.91910000  | -1.26540000 |
| H | 0.17980000  | 8.23260000  | -1.49360000 |
| H | 1.60380000  | 8.61910000  | -0.52110000 |
| C | 2.07100000  | 7.85740000  | -2.51180000 |
| H | 1.67060000  | 7.13240000  | -3.23000000 |
| H | 2.10170000  | 8.84270000  | -2.99330000 |
| H | 3.09830000  | 7.56660000  | -2.26190000 |

---

**Species TSHI**

HF energy= -2626.91734540

Imaginary frequency= 57i

Zero-point correction= 0.355610 (Hartree/Particle)



|                                              |              |
|----------------------------------------------|--------------|
| Thermal correction to Energy=                | 0.401655     |
| Thermal correction to Enthalpy=              | 0.402599     |
| Thermal correction to Gibbs Free Energy=     | 0.270261     |
| Sum of electronic and zero-point Energies=   | -2626.561736 |
| Sum of electronic and thermal Energies=      | -2626.515691 |
| Sum of electronic and thermal Enthalpies=    | -2626.514747 |
| Sum of electronic and thermal Free Energies= | -2626.647085 |

Coordinates: **TSHI**

|    |             |             |             |
|----|-------------|-------------|-------------|
| Os | -1.53800000 | 0.60100000  | 1.88200000  |
| Os | 0.77120000  | -0.86570000 | 1.03410000  |
| Os | 0.67550000  | 2.08860000  | 1.03900000  |
| O  | -4.00850000 | 2.36710000  | 2.49280000  |
| O  | -1.28280000 | -0.37370000 | 4.79750000  |
| O  | -3.28330000 | -1.73810000 | 0.96940000  |
| O  | -0.50180000 | -3.56150000 | 1.75770000  |
| O  | 1.98640000  | -0.52350000 | 3.82360000  |
| O  | 3.36840000  | -2.11820000 | -0.10520000 |
| O  | 2.76580000  | 1.04720000  | -1.02510000 |
| O  | -0.87350000 | 3.68860000  | 3.20050000  |
| O  | 3.06360000  | 2.82940000  | 2.77180000  |
| N  | -0.17320000 | -0.68860000 | -0.95100000 |
| C  | -2.13800000 | 1.61280000  | -2.99360000 |
| C  | -2.46680000 | 2.59100000  | -2.05880000 |
| C  | -2.06740000 | 2.47590000  | -0.71630000 |
| C  | -1.30920000 | 1.38990000  | -0.22850000 |
| C  | -1.37500000 | 0.52510000  | -2.55410000 |
| C  | -0.95760000 | 0.43400000  | -1.21630000 |
| C  | -3.06830000 | 1.74740000  | 2.25820000  |
| C  | -1.37810000 | -0.01970000 | 3.70700000  |
| C  | -2.61430000 | -0.87260000 | 1.33370000  |
| C  | -0.04840000 | -2.54140000 | 1.47280000  |
| C  | 1.51920000  | -0.64160000 | 2.77840000  |
| C  | 2.40490000  | -1.63060000 | 0.29260000  |
| C  | 1.94200000  | 1.25220000  | -0.23760000 |
| C  | -0.46650000 | 2.95190000  | 2.40300000  |
| C  | 2.16630000  | 2.55030000  | 2.10550000  |
| H  | -0.23720000 | 5.23660000  | 1.33180000  |
| S  | -0.77730000 | -0.85630000 | -3.45920000 |
| C  | -0.01170000 | -1.43110000 | -2.01720000 |
| H  | 0.57260000  | -2.34470000 | -2.01530000 |
| H  | -2.36040000 | 3.26590000  | -0.02950000 |
| H  | -3.04090000 | 3.45850000  | -2.37460000 |
| H  | -2.45010000 | 1.70090000  | -4.03080000 |
| C  | 0.32490000  | 5.14850000  | 0.40640000  |
| C  | 0.81540000  | 3.96550000  | -0.02160000 |

|   |             |             |             |
|---|-------------|-------------|-------------|
| C | 1.40950000  | 3.84300000  | -1.39360000 |
| O | 0.81680000  | 3.27880000  | -2.29100000 |
| O | 2.73480000  | 4.07550000  | -1.35440000 |
| C | 3.51830000  | 3.48350000  | -2.41540000 |
| H | 3.21280000  | 3.94530000  | -3.36120000 |
| H | 3.29660000  | 2.41170000  | -2.46890000 |
| C | 4.97800000  | 3.61120000  | -2.01750000 |
| H | 5.16950000  | 3.10500000  | -1.06390000 |
| H | 5.61510000  | 3.15370000  | -2.78480000 |
| H | 5.26340000  | 4.66430000  | -1.91310000 |
| C | 0.35800000  | 6.42510000  | -0.34960000 |
| O | -0.49680000 | 6.78530000  | -1.13470000 |
| O | 1.45920000  | 7.16260000  | -0.07180000 |
| C | 1.57430000  | 8.41170000  | -0.78320000 |
| H | 1.66500000  | 8.25260000  | -1.86470000 |
| H | 0.64550000  | 8.98190000  | -0.65920000 |
| C | 2.64310000  | 9.26270000  | -0.12010000 |
| H | 3.63400000  | 8.79530000  | -0.15820000 |
| H | 2.69430000  | 10.22390000 | -0.64660000 |
| H | 2.36470000  | 9.51560000  | 0.90980000  |

---

### Species I

HF energy= -2626.92900211

No imaginary frequency

Zero-point correction= 0.356175 (Hartree/Particle)

Thermal correction to Energy= 0.402899

Thermal correction to Enthalpy= 0.403843

Thermal correction to Gibbs Free Energy= 0.269436

Sum of electronic and zero-point Energies= -2626.572827

Sum of electronic and thermal Energies= -2626.526103

Sum of electronic and thermal Enthalpies= -2626.525159

Sum of electronic and thermal Free Energies= -2626.659566

### Coordinates: I

|    |             |             |             |
|----|-------------|-------------|-------------|
| Os | -1.74500000 | 0.41610000  | 1.76330000  |
| Os | 0.64450000  | -0.98970000 | 1.03800000  |
| Os | 0.56420000  | 1.94380000  | 1.37020000  |
| O  | -4.26520000 | 2.14540000  | 2.26390000  |
| O  | -1.84960000 | -0.88050000 | 4.56010000  |
| O  | -3.37420000 | -1.77610000 | 0.38770000  |
| O  | -0.71860000 | -3.72730000 | 1.28090000  |
| O  | 1.50830000  | -0.99510000 | 3.97550000  |
| O  | 3.35760000  | -2.14910000 | 0.08610000  |
| O  | 2.89230000  | 1.11300000  | -0.52840000 |
| O  | -1.24080000 | 3.34160000  | 3.47100000  |

|   |             |             |             |
|---|-------------|-------------|-------------|
| O | 2.71140000  | 2.43050000  | 3.46940000  |
| N | -0.04670000 | -0.56900000 | -1.01350000 |
| C | -1.74480000 | 1.98020000  | -3.00000000 |
| C | -2.18020000 | 2.85240000  | -2.00600000 |
| C | -1.94380000 | 2.58100000  | -0.64770000 |
| C | -1.25330000 | 1.43430000  | -0.19970000 |
| C | -1.04260000 | 0.83790000  | -2.59960000 |
| C | -0.78920000 | 0.58970000  | -1.24090000 |
| C | -3.30560000 | 1.53880000  | 2.07720000  |
| C | -1.81040000 | -0.40620000 | 3.51250000  |
| C | -2.75080000 | -0.96880000 | 0.92530000  |
| C | -0.22960000 | -2.68950000 | 1.17440000  |
| C | 1.17280000  | -0.98270000 | 2.87450000  |
| C | 2.35400000  | -1.69340000 | 0.41720000  |
| C | 1.97870000  | 1.23930000  | 0.17080000  |
| C | -0.73870000 | 2.68000000  | 2.66150000  |
| C | 1.90750000  | 2.24730000  | 2.66480000  |
| H | -0.11500000 | 5.10280000  | 2.04610000  |
| S | -0.34340000 | -0.44170000 | -3.57840000 |
| C | 0.24070000  | -1.18870000 | -2.13050000 |
| H | 0.81790000  | -2.10620000 | -2.16270000 |
| H | -2.31360000 | 3.29380000  | 0.08510000  |
| H | -2.70840000 | 3.75990000  | -2.28750000 |
| H | -1.92950000 | 2.18990000  | -4.05020000 |
| C | 0.40010000  | 5.07220000  | 1.09020000  |
| C | 0.85490000  | 3.91870000  | 0.55550000  |
| C | 1.57840000  | 3.95670000  | -0.76000000 |
| O | 1.09810000  | 3.60410000  | -1.81840000 |
| O | 2.86440000  | 4.31660000  | -0.60040000 |
| C | 3.64690000  | 4.43280000  | -1.81040000 |
| H | 3.16040000  | 5.17000000  | -2.45900000 |
| H | 3.64660000  | 3.46630000  | -2.32760000 |
| C | 5.04570000  | 4.86290000  | -1.40610000 |
| H | 5.51060000  | 4.11840000  | -0.74900000 |
| H | 5.67370000  | 4.97510000  | -2.29890000 |
| H | 5.01960000  | 5.82300000  | -0.87830000 |
| C | 0.56270000  | 6.39180000  | 0.43320000  |
| O | 1.02520000  | 6.60250000  | -0.67120000 |
| O | 0.10360000  | 7.37850000  | 1.24080000  |
| C | 0.20570000  | 8.71880000  | 0.71960000  |
| H | 1.25700000  | 8.93040000  | 0.48870000  |
| H | -0.35420000 | 8.77700000  | -0.22220000 |
| C | -0.34840000 | 9.66320000  | 1.77220000  |
| H | 0.22160000  | 9.58630000  | 2.70540000  |
| H | -0.28790000 | 10.69850000 | 1.41440000  |
| H | -1.39800000 | 9.43410000  | 1.99060000  |

---

**Species TSIJ**

HF energy= -2626.92331858

Imaginary frequency=  $8i$ 

Zero-point correction= 0.355904 (Hartree/Particle)

Thermal correction to Energy= 0.401933

Thermal correction to Enthalpy= 0.402877

Thermal correction to Gibbs Free Energy= 0.270767

Sum of electronic and zero-point Energies= -2626.567414

Sum of electronic and thermal Energies= -2626.521386

Sum of electronic and thermal Enthalpies= -2626.520442

Sum of electronic and thermal Free Energies= -2626.652552

**Coordinates: TSIJ**

|    |             |             |             |
|----|-------------|-------------|-------------|
| Os | -2.16200000 | 0.36310000  | 1.24880000  |
| Os | 0.41810000  | -0.77520000 | 1.60340000  |
| Os | 0.02180000  | 2.15530000  | 1.20540000  |
| O  | -4.83380000 | 1.80580000  | 0.64310000  |
| O  | -3.04130000 | -0.31370000 | 4.13000000  |
| O  | -3.11210000 | -2.28400000 | 0.05630000  |
| O  | -0.56080000 | -3.66610000 | 1.90650000  |
| O  | 0.20430000  | -0.26240000 | 4.61280000  |
| O  | 3.43870000  | -1.45020000 | 1.81840000  |
| O  | 2.78830000  | 1.35970000  | -0.00650000 |
| O  | -2.46070000 | 3.77790000  | 2.13550000  |
| O  | 1.26820000  | 2.80340000  | 3.88920000  |
| N  | 0.43530000  | -0.83430000 | -0.59980000 |
| C  | -0.73060000 | 0.97930000  | -3.54680000 |
| C  | -1.60290000 | 1.89900000  | -2.96870000 |
| C  | -1.84070000 | 1.90180000  | -1.58180000 |
| C  | -1.21840000 | 1.00590000  | -0.68510000 |
| C  | -0.08390000 | 0.07700000  | -2.69430000 |
| C  | -0.30840000 | 0.11070000  | -1.30630000 |
| C  | -3.81700000 | 1.31190000  | 0.86540000  |
| C  | -2.70330000 | -0.07200000 | 3.05690000  |
| C  | -2.75560000 | -1.29460000 | 0.53070000  |
| C  | -0.20370000 | -2.57790000 | 1.77530000  |
| C  | 0.27160000  | -0.44020000 | 3.47750000  |
| C  | 2.32540000  | -1.17550000 | 1.71350000  |
| C  | 1.77000000  | 1.54300000  | 0.49500000  |
| C  | -1.64630000 | 3.03980000  | 1.78600000  |
| C  | 0.80330000  | 2.57650000  | 2.85870000  |
| H  | -0.93110000 | 4.24050000  | -1.19550000 |
| S  | 1.05980000  | -1.19730000 | -3.08400000 |
| C  | 1.17060000  | -1.56780000 | -1.39540000 |

|   |             |             |             |
|---|-------------|-------------|-------------|
| H | 1.82580000  | -2.35280000 | -1.03400000 |
| H | -2.56170000 | 2.61860000  | -1.19540000 |
| H | -2.11610000 | 2.61870000  | -3.60220000 |
| H | -0.55770000 | 0.96680000  | -4.61980000 |
| C | -0.08780000 | 4.69130000  | -0.68480000 |
| C | 0.53200000  | 4.08100000  | 0.34380000  |
| C | 1.71340000  | 4.74190000  | 0.99380000  |
| O | 2.86750000  | 4.45670000  | 0.75680000  |
| O | 1.32670000  | 5.59700000  | 1.95940000  |
| C | 2.38730000  | 6.32270000  | 2.62490000  |
| H | 2.93800000  | 6.88910000  | 1.86540000  |
| H | 3.07770000  | 5.60420000  | 3.08220000  |
| C | 1.73920000  | 7.22860000  | 3.65640000  |
| H | 1.18360000  | 6.64350000  | 4.39880000  |
| H | 2.51030000  | 7.80720000  | 4.18030000  |
| H | 1.04590000  | 7.92950000  | 3.17740000  |
| C | 0.31800000  | 6.01920000  | -1.20630000 |
| O | 1.23240000  | 6.70910000  | -0.80460000 |
| O | -0.49090000 | 6.38720000  | -2.23250000 |
| C | -0.20560000 | 7.67080000  | -2.82530000 |
| H | -0.28200000 | 8.44360000  | -2.05060000 |
| H | 0.82950000  | 7.67210000  | -3.18810000 |
| C | -1.20460000 | 7.89030000  | -3.94810000 |
| H | -2.23220000 | 7.88160000  | -3.56580000 |
| H | -1.02290000 | 8.86100000  | -4.42560000 |
| H | -1.11380000 | 7.10900000  | -4.71200000 |

---

### Species J

HF energy= -2626.92832706

No imaginary frequency

Zero-point correction= 0.356147 (Hartree/Particle)

Thermal correction to Energy= 0.402899

Thermal correction to Enthalpy= 0.403843

Thermal correction to Gibbs Free Energy= 0.269104

Sum of electronic and zero-point Energies= -2626.572180

Sum of electronic and thermal Energies= -2626.525428

Sum of electronic and thermal Enthalpies= -2626.524484

Sum of electronic and thermal Free Energies= -2626.659223

### Coordinates: J

|    |             |             |            |
|----|-------------|-------------|------------|
| Os | -1.74200000 | 0.47550000  | 1.76960000 |
| Os | 0.62140000  | -0.95440000 | 1.04070000 |
| Os | 0.58150000  | 1.98180000  | 1.35850000 |
| O  | -4.21950000 | 2.26570000  | 2.27850000 |
| O  | -1.86660000 | -0.82850000 | 4.56170000 |

|   |             |             |             |
|---|-------------|-------------|-------------|
| O | -3.40870000 | -1.69140000 | 0.39950000  |
| O | -0.73860000 | -3.69130000 | 1.30520000  |
| O | 1.49920000  | -0.94700000 | 3.97350000  |
| O | 3.33670000  | -2.09850000 | 0.07250000  |
| O | 2.82370000  | 1.16970000  | -0.63620000 |
| O | -1.15340000 | 3.32290000  | 3.56710000  |
| O | 2.80060000  | 2.40330000  | 3.40130000  |
| N | -0.08810000 | -0.54660000 | -1.00950000 |
| C | -1.72740000 | 2.03720000  | -3.00310000 |
| C | -2.13530000 | 2.92510000  | -2.00950000 |
| C | -1.91040000 | 2.64940000  | -0.64840000 |
| C | -1.25400000 | 1.48290000  | -0.20060000 |
| C | -1.05870000 | 0.87410000  | -2.60050000 |
| C | -0.81030000 | 0.62520000  | -1.24030000 |
| C | -3.27500000 | 1.63640000  | 2.09030000  |
| C | -1.81940000 | -0.35100000 | 3.51630000  |
| C | -2.77500000 | -0.89130000 | 0.93620000  |
| C | -0.24830000 | -2.65500000 | 1.18980000  |
| C | 1.15940000  | -0.93760000 | 2.87390000  |
| C | 2.33290000  | -1.64840000 | 0.41100000  |
| C | 1.94980000  | 1.29580000  | 0.11200000  |
| C | -0.67870000 | 2.70460000  | 2.71110000  |
| C | 1.96720000  | 2.26690000  | 2.62090000  |
| H | 1.74480000  | 3.42300000  | -1.36170000 |
| S | -0.39860000 | -0.43070000 | -3.57510000 |
| C | 0.17790000  | -1.18000000 | -2.12310000 |
| H | 0.73530000  | -2.10980000 | -2.15290000 |
| H | -2.24940000 | 3.38030000  | 0.08090000  |
| H | -2.64010000 | 3.84580000  | -2.29190000 |
| H | -1.91330000 | 2.24650000  | -4.05340000 |
| C | 1.39820000  | 4.20660000  | -0.69380000 |
| C | 0.88430000  | 3.93760000  | 0.52470000  |
| C | 0.51160000  | 5.07020000  | 1.43510000  |
| O | 1.22390000  | 5.48690000  | 2.32060000  |
| O | -0.75840000 | 5.48480000  | 1.22720000  |
| C | -1.18730000 | 6.60740000  | 2.03470000  |
| H | -0.51220000 | 7.44630000  | 1.83280000  |
| H | -1.09350000 | 6.33840000  | 3.09280000  |
| C | -2.62140000 | 6.92550000  | 1.65170000  |
| H | -3.28310000 | 6.07450000  | 1.85570000  |
| H | -2.98000000 | 7.78290000  | 2.23460000  |
| H | -2.69460000 | 7.17840000  | 0.58740000  |
| C | 1.54900000  | 5.58180000  | -1.22540000 |
| O | 1.24590000  | 6.61580000  | -0.66450000 |
| O | 2.09020000  | 5.54850000  | -2.46980000 |
| C | 2.32080000  | 6.82980000  | -3.08890000 |

|   |            |            |             |
|---|------------|------------|-------------|
| H | 1.36230000 | 7.35480000 | -3.18910000 |
| H | 2.95620000 | 7.43320000 | -2.42950000 |
| C | 2.97510000 | 6.57690000 | -4.43620000 |
| H | 2.32700000 | 5.97050000 | -5.08010000 |
| H | 3.16930000 | 7.53040000 | -4.94250000 |
| H | 3.92890000 | 6.05030000 | -4.31450000 |

---

**Species TSJK**

HF energy= -2626.89735623

Imaginary frequency= 53i

Zero-point correction= 0.355375 (Hartree/Particle)

Thermal correction to Energy= 0.401630

Thermal correction to Enthalpy= 0.402574

Thermal correction to Gibbs Free Energy= 0.267551

Sum of electronic and zero-point Energies= -2626.541982

Sum of electronic and thermal Energies= -2626.495726

Sum of electronic and thermal Enthalpies= -2626.494782

Sum of electronic and thermal Free Energies= -2626.629805

**Coordinates: TSJK**

|    |             |             |             |
|----|-------------|-------------|-------------|
| Os | -1.14220000 | -1.26970000 | 1.80200000  |
| Os | 0.40060000  | -1.47770000 | -0.63600000 |
| Os | 1.04720000  | 0.60370000  | 1.50200000  |
| O  | -2.28440000 | -0.66040000 | 4.60960000  |
| O  | -0.32910000 | -4.13130000 | 2.70220000  |
| O  | -3.80530000 | -2.17600000 | 0.63350000  |
| O  | -1.87280000 | -3.14970000 | -1.86000000 |
| O  | 1.80540000  | -4.01320000 | 0.36230000  |
| O  | 2.22560000  | -1.34760000 | -3.14670000 |
| O  | 3.42190000  | -0.83110000 | 0.29710000  |
| O  | 2.74480000  | 2.82580000  | 0.13530000  |
| O  | 1.72360000  | -1.21360000 | 3.86760000  |
| N  | -0.65160000 | 0.35680000  | -1.24400000 |
| C  | -2.58090000 | 3.23320000  | -0.07310000 |
| C  | -2.77700000 | 2.89900000  | 1.26780000  |
| C  | -2.27930000 | 1.70300000  | 1.80280000  |
| C  | -1.55280000 | 0.74470000  | 1.05370000  |
| C  | -1.84940000 | 2.33410000  | -0.84710000 |
| C  | -1.33990000 | 1.13200000  | -0.29960000 |
| C  | -1.85270000 | -0.85630000 | 3.56250000  |
| C  | -0.60480000 | -3.07010000 | 2.36060000  |
| C  | -2.78590000 | -1.86780000 | 1.07500000  |
| C  | -1.04240000 | -2.51650000 | -1.37630000 |
| C  | 1.27120000  | -3.05980000 | 0.01010000  |
| C  | 1.57170000  | -1.35510000 | -2.20090000 |

|   |             |             |             |
|---|-------------|-------------|-------------|
| C | 2.31780000  | -0.50430000 | 0.51110000  |
| C | 2.07690000  | 2.03140000  | 0.62540000  |
| C | 1.31180000  | -0.59240000 | 2.98120000  |
| H | -0.07280000 | 3.61700000  | 1.84880000  |
| S | -1.44710000 | 2.43900000  | -2.55430000 |
| C | -0.64590000 | 0.90990000  | -2.42780000 |
| H | -0.15340000 | 0.46560000  | -3.28510000 |
| H | -2.47380000 | 1.51100000  | 2.85410000  |
| H | -3.33100000 | 3.57960000  | 1.91030000  |
| H | -2.97910000 | 4.15310000  | -0.49240000 |
| C | 0.49890000  | 3.42360000  | 2.75270000  |
| C | 1.11300000  | 2.24120000  | 2.95800000  |
| C | 1.99060000  | 2.03120000  | 4.15480000  |
| O | 3.19230000  | 2.16980000  | 4.13410000  |
| O | 1.28990000  | 1.57920000  | 5.21120000  |
| C | 2.05250000  | 1.35880000  | 6.42220000  |
| H | 2.53670000  | 2.30290000  | 6.69570000  |
| H | 2.83560000  | 0.62040000  | 6.21470000  |
| C | 1.08510000  | 0.88150000  | 7.48990000  |
| H | 0.60410000  | -0.05790000 | 7.19240000  |
| H | 1.62490000  | 0.70940000  | 8.42940000  |
| H | 0.30460000  | 1.62950000  | 7.67160000  |
| C | 0.52720000  | 4.53870000  | 3.73050000  |
| O | 1.13170000  | 4.56320000  | 4.78200000  |
| O | -0.23920000 | 5.56940000  | 3.29040000  |
| C | -0.28430000 | 6.72620000  | 4.15170000  |
| H | -0.65270000 | 6.42010000  | 5.13840000  |
| H | 0.73560000  | 7.10650000  | 4.28660000  |
| C | -1.19280000 | 7.75190000  | 3.49670000  |
| H | -2.20740000 | 7.35480000  | 3.37160000  |
| H | -1.25080000 | 8.65200000  | 4.12090000  |
| H | -0.81100000 | 8.04090000  | 2.51040000  |

---

### Species K

HF energy= -2626.92262191

No imaginary frequency

Zero-point correction= 0.355818 (Hartree/Particle)

Thermal correction to Energy= 0.402565

Thermal correction to Enthalpy= 0.403510

Thermal correction to Gibbs Free Energy= 0.269897

Sum of electronic and zero-point Energies= -2626.566804

Sum of electronic and thermal Energies= -2626.520057

Sum of electronic and thermal Enthalpies= -2626.519112

Sum of electronic and thermal Free Energies= -2626.652725



Coordinates: **K**

|    |             |             |             |
|----|-------------|-------------|-------------|
| Os | -1.36780000 | 0.64540000  | 2.22060000  |
| Os | 0.94910000  | -0.64530000 | 1.05260000  |
| Os | 0.64100000  | 2.20790000  | 0.77840000  |
| O  | -4.02350000 | 1.97910000  | 3.10090000  |
| O  | -0.94990000 | -0.95520000 | 4.80150000  |
| O  | -2.82690000 | -1.83310000 | 1.16020000  |
| O  | 0.28380000  | -3.61600000 | 1.59910000  |
| O  | 2.53200000  | -0.51270000 | 3.66320000  |
| O  | 3.52820000  | -1.03210000 | -0.60400000 |
| O  | 1.73480000  | 1.75270000  | -2.01930000 |
| O  | 3.58070000  | 2.64240000  | 1.56090000  |
| O  | 0.09410000  | 5.19940000  | 0.17210000  |
| N  | -0.33300000 | -0.62000000 | -0.75830000 |
| C  | -2.99240000 | 1.24250000  | -2.43550000 |
| C  | -3.19370000 | 2.29320000  | -1.53850000 |
| C  | -2.43840000 | 2.39630000  | -0.35920000 |
| C  | -1.43930000 | 1.46450000  | 0.00610000  |
| C  | -2.01360000 | 0.29560000  | -2.11580000 |
| C  | -1.26570000 | 0.40630000  | -0.92910000 |
| C  | -3.01160000 | 1.54950000  | 2.76010000  |
| C  | -1.07690000 | -0.31140000 | 3.85650000  |
| C  | -2.25480000 | -0.91420000 | 1.55710000  |
| C  | 0.50470000  | -2.50070000 | 1.39810000  |
| C  | 1.92910000  | -0.51780000 | 2.68120000  |
| C  | 2.55500000  | -0.86350000 | -0.00660000 |
| C  | 1.34030000  | 1.90840000  | -0.94490000 |
| C  | 2.46090000  | 2.48430000  | 1.36820000  |
| C  | 0.23720000  | 4.09370000  | 0.46000000  |
| H  | -1.67050000 | 3.97320000  | 2.47430000  |
| S  | -1.50780000 | -1.13040000 | -3.00970000 |
| C  | -0.35820000 | -1.46790000 | -1.75180000 |
| H  | 0.29330000  | -2.33320000 | -1.80280000 |
| H  | -2.63540000 | 3.23820000  | 0.30030000  |
| H  | -3.94750000 | 3.04520000  | -1.76060000 |
| H  | -3.57590000 | 1.16600000  | -3.34930000 |
| C  | -0.91030000 | 3.69900000  | 3.20200000  |
| C  | -0.24950000 | 2.51160000  | 3.10280000  |
| C  | 0.80790000  | 2.26830000  | 4.15220000  |
| O  | 1.99230000  | 2.45740000  | 3.97290000  |
| O  | 0.28880000  | 1.78130000  | 5.28670000  |
| C  | 1.21300000  | 1.62600000  | 6.39640000  |
| H  | 1.65340000  | 2.60790000  | 6.59950000  |
| H  | 2.01260000  | 0.94330000  | 6.08960000  |
| C  | 0.42210000  | 1.09450000  | 7.57750000  |
| H  | -0.02500000 | 0.12110000  | 7.34620000  |

|   |             |            |            |
|---|-------------|------------|------------|
| H | 1.08810000  | 0.97270000 | 8.44080000 |
| H | -0.37870000 | 1.78960000 | 7.85580000 |
| C | -0.69230000 | 4.72920000 | 4.25140000 |
| O | 0.12870000  | 4.69220000 | 5.14460000 |
| O | -1.55580000 | 5.75470000 | 4.07130000 |
| C | -1.45810000 | 6.83820000 | 5.02240000 |
| H | -1.61980000 | 6.43620000 | 6.03000000 |
| H | -0.43960000 | 7.24350000 | 4.98840000 |
| C | -2.50120000 | 7.87460000 | 4.64510000 |
| H | -3.50980000 | 7.44650000 | 4.68040000 |
| H | -2.45900000 | 8.71670000 | 5.34660000 |
| H | -2.32360000 | 8.25900000 | 3.63390000 |

---

### Species TSKL

HF energy= -2626.91496039

Imaginary frequency= 69i

Zero-point correction= 0.355654 (Hartree/Particle)

Thermal correction to Energy= 0.401672

Thermal correction to Enthalpy= 0.402616

Thermal correction to Gibbs Free Energy= 0.271052

Sum of electronic and zero-point Energies= -2626.559306

Sum of electronic and thermal Energies= -2626.513288

Sum of electronic and thermal Enthalpies= -2626.512344

Sum of electronic and thermal Free Energies= -2626.643908

### Coordinates: TSKL

|    |             |             |             |
|----|-------------|-------------|-------------|
| Os | -1.50550000 | 0.50470000  | 2.27180000  |
| Os | 0.86330000  | -0.86240000 | 1.06760000  |
| Os | 0.95070000  | 1.93410000  | 0.89300000  |
| O  | -4.39420000 | 1.45720000  | 2.79500000  |
| O  | -1.13480000 | -1.05760000 | 4.89580000  |
| O  | -2.73990000 | -2.02410000 | 0.97110000  |
| O  | 0.10250000  | -3.84390000 | 1.45240000  |
| O  | 2.32460000  | -0.80940000 | 3.75190000  |
| O  | 3.44010000  | -1.34970000 | -0.54490000 |
| O  | 1.58130000  | 1.86340000  | -2.05100000 |
| O  | 3.93940000  | 1.95830000  | 1.50290000  |
| O  | 0.60130000  | 5.04050000  | 0.95730000  |
| N  | -0.39060000 | -0.62900000 | -0.75700000 |
| C  | -2.64320000 | 1.71880000  | -2.42360000 |
| C  | -2.77990000 | 2.70060000  | -1.44180000 |
| C  | -2.16340000 | 2.56660000  | -0.18490000 |
| C  | -1.37080000 | 1.45420000  | 0.17250000  |
| C  | -1.84250000 | 0.61070000  | -2.12210000 |
| C  | -1.20930000 | 0.50070000  | -0.87160000 |

|   |             |             |             |
|---|-------------|-------------|-------------|
| C | -3.29670000 | 1.16680000  | 2.60450000  |
| C | -1.26420000 | -0.46190000 | 3.91870000  |
| C | -2.21190000 | -1.10290000 | 1.41960000  |
| C | 0.35200000  | -2.72740000 | 1.30940000  |
| C | 1.76820000  | -0.80100000 | 2.74210000  |
| C | 2.45970000  | -1.16400000 | 0.03560000  |
| C | 1.34510000  | 1.88800000  | -0.91810000 |
| C | 2.81050000  | 1.94700000  | 1.28600000  |
| C | 0.67550000  | 3.89600000  | 0.97770000  |
| H | -2.47160000 | 3.66090000  | 2.84870000  |
| S | -1.41760000 | -0.76560000 | -3.12960000 |
| C | -0.41970000 | -1.36080000 | -1.83830000 |
| H | 0.15160000  | -2.27630000 | -1.94550000 |
| H | -2.32530000 | 3.35040000  | 0.55180000  |
| H | -3.38640000 | 3.57950000  | -1.65030000 |
| H | -3.12960000 | 1.81930000  | -3.39020000 |
| C | -1.54290000 | 3.50940000  | 3.39360000  |
| C | -0.87370000 | 2.33200000  | 3.33960000  |
| C | 0.38700000  | 2.20830000  | 4.11630000  |
| O | 1.48150000  | 2.18430000  | 3.55670000  |
| O | 0.22650000  | 2.00140000  | 5.41530000  |
| C | 1.43370000  | 1.88610000  | 6.21960000  |
| H | 1.95770000  | 2.84650000  | 6.16330000  |
| H | 2.07190000  | 1.11200000  | 5.78170000  |
| C | 1.00130000  | 1.54740000  | 7.63370000  |
| H | 0.46270000  | 0.59310000  | 7.66050000  |
| H | 1.88550000  | 1.46310000  | 8.27750000  |
| H | 0.34960000  | 2.32830000  | 8.04170000  |
| C | -1.06620000 | 4.69040000  | 4.14910000  |
| O | 0.01290000  | 4.79950000  | 4.70160000  |
| O | -1.99200000 | 5.67640000  | 4.13320000  |
| C | -1.63320000 | 6.89140000  | 4.82590000  |
| H | -1.43270000 | 6.65150000  | 5.87720000  |
| H | -0.70390000 | 7.28270000  | 4.39460000  |
| C | -2.78910000 | 7.86420000  | 4.67340000  |
| H | -3.70830000 | 7.45170000  | 5.10540000  |
| H | -2.55590000 | 8.80340000  | 5.18980000  |
| H | -2.97510000 | 8.08900000  | 3.61660000  |

---

### Species L

HF energy= -2626.92422452

No imaginary frequency

Zero-point correction= 0.356680 (Hartree/Particle)

Thermal correction to Energy= 0.402962

Thermal correction to Enthalpy= 0.403907

|                                              |              |
|----------------------------------------------|--------------|
| Thermal correction to Gibbs Free Energy=     | 0.271616     |
| Sum of electronic and zero-point Energies=   | -2626.567545 |
| Sum of electronic and thermal Energies=      | -2626.521262 |
| Sum of electronic and thermal Enthalpies=    | -2626.520318 |
| Sum of electronic and thermal Free Energies= | -2626.652608 |

Coordinates: **L**

|    |             |             |             |
|----|-------------|-------------|-------------|
| Os | -1.57810000 | 0.42170000  | 2.29070000  |
| Os | 0.88200000  | -0.77530000 | 1.06640000  |
| Os | 1.21840000  | 2.01930000  | 1.26190000  |
| O  | -4.40470000 | 1.25900000  | 3.18970000  |
| O  | -0.86620000 | -1.13590000 | 4.88530000  |
| O  | -2.76310000 | -2.15290000 | 1.04880000  |
| O  | 0.07800000  | -3.76120000 | 1.23910000  |
| O  | 2.33540000  | -0.94110000 | 3.74940000  |
| O  | 3.46020000  | -1.27520000 | -0.53840000 |
| O  | 1.22270000  | 2.07790000  | -1.77780000 |
| O  | 4.24100000  | 1.94340000  | 1.16740000  |
| O  | 0.96350000  | 5.13640000  | 1.19360000  |
| N  | -0.34440000 | -0.42410000 | -0.77060000 |
| C  | -2.77810000 | 1.73680000  | -2.45570000 |
| C  | -3.24880000 | 2.49090000  | -1.38530000 |
| C  | -2.83100000 | 2.23250000  | -0.06460000 |
| C  | -1.89940000 | 1.23730000  | 0.27340000  |
| C  | -1.83070000 | 0.75260000  | -2.16020000 |
| C  | -1.36970000 | 0.54040000  | -0.84220000 |
| C  | -3.34250000 | 0.97870000  | 2.84610000  |
| C  | -1.10680000 | -0.52500000 | 3.93920000  |
| C  | -2.25890000 | -1.21970000 | 1.49600000  |
| C  | 0.31690000  | -2.63730000 | 1.14950000  |
| C  | 1.78070000  | -0.85530000 | 2.74100000  |
| C  | 2.48590000  | -1.08770000 | 0.05250000  |
| C  | 1.17180000  | 2.01760000  | -0.62730000 |
| C  | 3.08860000  | 1.97800000  | 1.17810000  |
| C  | 1.02040000  | 4.00040000  | 1.33710000  |
| H  | -2.47170000 | 3.68420000  | 2.70270000  |
| S  | -1.01880000 | -0.34120000 | -3.26700000 |
| C  | -0.09340000 | -0.95450000 | -1.93890000 |
| H  | 0.66580000  | -1.71340000 | -2.09030000 |
| H  | -3.28810000 | 2.82380000  | 0.72600000  |
| H  | -3.97910000 | 3.27720000  | -1.56760000 |
| H  | -3.12310000 | 1.90930000  | -3.47130000 |
| C  | -1.55440000 | 3.51170000  | 3.25910000  |
| C  | -0.92450000 | 2.31120000  | 3.23140000  |
| C  | 0.30650000  | 2.13850000  | 4.03240000  |
| O  | 1.40940000  | 1.97910000  | 3.46410000  |

|   |             |            |            |
|---|-------------|------------|------------|
| O | 0.17160000  | 1.99700000 | 5.32820000 |
| C | 1.37960000  | 1.79350000 | 6.12560000 |
| H | 2.00250000  | 2.68580000 | 6.00290000 |
| H | 1.91490000  | 0.92800000 | 5.72400000 |
| C | 0.93610000  | 1.58870000 | 7.56080000 |
| H | 0.29830000  | 0.70200000 | 7.65090000 |
| H | 1.81820000  | 1.44550000 | 8.19660000 |
| H | 0.38210000  | 2.45980000 | 7.92800000 |
| C | -1.00580000 | 4.68220000 | 3.97520000 |
| O | 0.10810000  | 4.74410000 | 4.47080000 |
| O | -1.87990000 | 5.70800000 | 3.99030000 |
| C | -1.42850000 | 6.92090000 | 4.63450000 |
| H | -1.21650000 | 6.70050000 | 5.68780000 |
| H | -0.48900000 | 7.23880000 | 4.16720000 |
| C | -2.52630000 | 7.95790000 | 4.47780000 |
| H | -3.45780000 | 7.61730000 | 4.94450000 |
| H | -2.22220000 | 8.89600000 | 4.95800000 |
| H | -2.72430000 | 8.16100000 | 3.41900000 |

---

### Species TSLM

HF energy= -2626.92386235

Imaginary frequency= 21i

Zero-point correction= 0.356676 (Hartree/Particle)

Thermal correction to Energy= 0.402077

Thermal correction to Enthalpy= 0.403021

Thermal correction to Gibbs Free Energy= 0.273567

Sum of electronic and zero-point Energies= -2626.567186

Sum of electronic and thermal Energies= -2626.521786

Sum of electronic and thermal Enthalpies= -2626.520842

Sum of electronic and thermal Free Energies= -2626.650295

### Coordinates: TSLM

|    |             |             |             |
|----|-------------|-------------|-------------|
| Os | -1.59050000 | 0.32680000  | 2.36150000  |
| Os | 0.91860000  | -0.65990000 | 1.06020000  |
| Os | 1.29800000  | 2.17510000  | 1.36110000  |
| O  | -4.33780000 | 1.17690000  | 3.46550000  |
| O  | -0.74570000 | -1.22260000 | 4.92180000  |
| O  | -2.81430000 | -2.22040000 | 1.11450000  |
| O  | 0.07360000  | -3.62800000 | 1.14090000  |
| O  | 2.36670000  | -0.94040000 | 3.73840000  |
| O  | 3.46510000  | -1.22690000 | -0.58880000 |
| O  | 1.09500000  | 2.40990000  | -1.66660000 |
| O  | 4.26210000  | 1.68410000  | 1.08000000  |
| O  | 1.54980000  | 5.28900000  | 1.46420000  |
| N  | -0.30350000 | -0.25560000 | -0.75730000 |

|   |             |             |             |
|---|-------------|-------------|-------------|
| C | -2.92580000 | 1.77230000  | -2.31990000 |
| C | -3.48980000 | 2.38290000  | -1.20470000 |
| C | -3.05690000 | 2.07040000  | 0.09910000  |
| C | -2.01760000 | 1.16740000  | 0.38150000  |
| C | -1.88100000 | 0.87640000  | -2.08050000 |
| C | -1.41130000 | 0.61420000  | -0.77300000 |
| C | -3.30900000 | 0.88580000  | 3.03640000  |
| C | -1.03520000 | -0.61450000 | 3.98710000  |
| C | -2.30800000 | -1.29670000 | 1.57870000  |
| C | 0.33130000  | -2.50540000 | 1.09310000  |
| C | 1.81310000  | -0.81320000 | 2.73330000  |
| C | 2.51060000  | -0.98740000 | 0.01520000  |
| C | 1.13580000  | 2.28770000  | -0.52120000 |
| C | 3.12280000  | 1.84710000  | 1.16280000  |
| C | 1.37440000  | 4.15810000  | 1.54200000  |
| H | -2.31400000 | 3.62720000  | 2.47300000  |
| S | -0.96270000 | -0.05350000 | -3.25130000 |
| C | 0.00300000  | -0.67530000 | -1.95740000 |
| H | 0.82790000  | -1.35040000 | -2.15330000 |
| H | -3.59310000 | 2.53860000  | 0.92190000  |
| H | -4.30380000 | 3.09300000  | -1.33930000 |
| H | -3.27820000 | 1.98160000  | -3.32610000 |
| C | -1.44980000 | 3.46520000  | 3.11110000  |
| C | -0.85320000 | 2.24640000  | 3.19040000  |
| C | 0.33400000  | 2.09920000  | 4.06100000  |
| O | 1.47150000  | 2.00560000  | 3.54390000  |
| O | 0.13810000  | 1.91710000  | 5.34180000  |
| C | 1.30980000  | 1.71810000  | 6.19490000  |
| H | 1.90580000  | 2.63540000  | 6.14510000  |
| H | 1.89520000  | 0.89030000  | 5.78380000  |
| C | 0.79850000  | 1.43050000  | 7.59260000  |
| H | 0.18960000  | 0.51950000  | 7.60560000  |
| H | 1.65060000  | 1.28640000  | 8.26790000  |
| H | 0.19510000  | 2.26390000  | 7.96950000  |
| C | -0.95170000 | 4.64940000  | 3.84330000  |
| O | 0.10200000  | 4.69980000  | 4.45710000  |
| O | -1.79640000 | 5.69180000  | 3.73090000  |
| C | -1.39720000 | 6.91260000  | 4.39690000  |
| H | -1.28530000 | 6.70570000  | 5.46810000  |
| H | -0.41620000 | 7.21670000  | 4.01320000  |
| C | -2.46800000 | 7.95340000  | 4.12380000  |
| H | -3.44090000 | 7.62590000  | 4.50810000  |
| H | -2.20190000 | 8.89680000  | 4.61580000  |
| H | -2.56620000 | 8.14120000  | 3.04830000  |

---

**Species M**

HF energy= -2626.96347900

No imaginary frequency

Zero-point correction= 0.357832 (Hartree/Particle)

Thermal correction to Energy= 0.403236

Thermal correction to Enthalpy= 0.404180

Thermal correction to Gibbs Free Energy= 0.275342

Sum of electronic and zero-point Energies= -2626.605647

Sum of electronic and thermal Energies= -2626.560243

Sum of electronic and thermal Enthalpies= -2626.559299

Sum of electronic and thermal Free Energies= -2626.688137

Coordinates: **M**

|    |             |            |             |
|----|-------------|------------|-------------|
| Os | 1.97890000  | 6.22230000 | 7.44600000  |
| Os | 4.66090000  | 6.85480000 | 8.47930000  |
| Os | 5.78580000  | 4.26820000 | 9.49000000  |
| C  | 0.70530000  | 4.85410000 | 7.10010000  |
| C  | 0.80950000  | 7.77960000 | 7.16450000  |
| C  | 2.58610000  | 6.29530000 | 5.57620000  |
| C  | 5.63750000  | 6.62080000 | 6.86420000  |
| C  | 3.75220000  | 8.48310000 | 7.87260000  |
| C  | 6.21570000  | 7.64470000 | 9.29890000  |
| C  | 6.12440000  | 2.44560000 | 10.03790000 |
| C  | 5.89050000  | 4.89020000 | 11.26840000 |
| C  | 7.64850000  | 4.76090000 | 9.05530000  |
| O  | -0.04590000 | 4.00770000 | 6.88410000  |
| O  | 0.09480000  | 8.67070000 | 7.03570000  |
| O  | 2.87500000  | 6.42980000 | 4.47080000  |
| O  | 6.23900000  | 6.49630000 | 5.88930000  |
| O  | 3.45610000  | 9.55620000 | 7.56340000  |
| O  | 7.14020000  | 8.14450000 | 9.77730000  |
| O  | 6.34440000  | 1.36920000 | 10.37460000 |
| O  | 5.94050000  | 5.25910000 | 12.36150000 |
| O  | 8.73280000  | 5.02350000 | 8.78620000  |
| N  | 3.53050000  | 7.12220000 | 10.39740000 |
| S  | 2.98340000  | 7.72270000 | 12.85370000 |
| O  | 5.41040000  | 3.57840000 | 7.43640000  |
| O  | 3.81390000  | 3.84440000 | 5.90970000  |
| O  | 2.98300000  | 2.03650000 | 8.26830000  |
| O  | 2.83000000  | 2.15600000 | 10.51890000 |
| C  | 4.05210000  | 7.58720000 | 11.50380000 |
| H  | 5.09380000  | 7.86430000 | 11.60210000 |
| C  | 2.15650000  | 6.85110000 | 10.54140000 |
| C  | 1.31180000  | 6.38630000 | 9.50870000  |
| C  | -0.01670000 | 6.16510000 | 9.91130000  |
| H  | -0.74010000 | 5.81050000 | 9.17970000  |

|   |             |             |             |
|---|-------------|-------------|-------------|
| C | -0.48550000 | 6.39040000  | 11.21860000 |
| H | -1.53050000 | 6.19350000  | 11.45100000 |
| C | 0.35610000  | 6.87400000  | 12.21450000 |
| H | -0.00100000 | 7.06880000  | 13.22200000 |
| C | 1.68460000  | 7.10140000  | 11.85200000 |
| C | 3.77760000  | 2.85710000  | 3.72600000  |
| H | 4.31600000  | 2.20680000  | 3.02590000  |
| H | 3.64460000  | 3.83750000  | 3.25560000  |
| H | 2.79070000  | 2.41990000  | 3.91450000  |
| C | 4.57070000  | 2.97300000  | 5.01300000  |
| H | 4.69420000  | 2.01090000  | 5.51980000  |
| H | 5.55820000  | 3.42080000  | 4.85990000  |
| C | 4.28700000  | 4.04650000  | 7.11120000  |
| C | 3.51560000  | 4.87530000  | 8.09740000  |
| C | 3.58300000  | 4.08710000  | 9.39300000  |
| H | 3.10100000  | 4.57930000  | 10.23310000 |
| C | 3.10610000  | 2.67550000  | 9.30020000  |
| C | 2.39240000  | 0.77840000  | 10.54470000 |
| H | 3.19740000  | 0.14520000  | 10.15180000 |
| H | 1.52830000  | 0.66960000  | 9.87930000  |
| C | 2.05260000  | 0.43390000  | 11.98390000 |
| H | 1.71650000  | -0.60840000 | 12.04750000 |
| H | 1.25060000  | 1.07900000  | 12.36150000 |
| H | 2.92770000  | 0.55410000  | 12.63350000 |

---

### Species N

HF energy= -344.509527570

No imaginary frequency

Zero-point correction= 0.099855 (Hartree/Particle)

Thermal correction to Energy= 0.107491

Thermal correction to Enthalpy= 0.108435

Thermal correction to Gibbs Free Energy= 0.067785

Sum of electronic and zero-point Energies= -344.409673

Sum of electronic and thermal Energies= -344.402037

Sum of electronic and thermal Enthalpies= -344.401093

Sum of electronic and thermal Free Energies= -344.441742

### Coordinates: N

|   |             |             |             |
|---|-------------|-------------|-------------|
| C | -0.86830000 | -0.36070000 | 0.66930000  |
| H | -1.75150000 | -0.37030000 | 1.27030000  |
| C | 0.13030000  | -0.35020000 | -0.01300000 |
| C | 1.31670000  | -0.40500000 | -0.84890000 |
| O | 1.65370000  | -1.38060000 | -1.48110000 |
| O | 1.97370000  | 0.76960000  | -0.82210000 |
| C | 3.18190000  | 0.84780000  | -1.62140000 |



|   |            |             |             |
|---|------------|-------------|-------------|
| H | 3.28940000 | 1.91630000  | -1.82980000 |
| H | 3.01830000 | 0.30850000  | -2.55950000 |
| C | 4.38450000 | 0.29750000  | -0.86670000 |
| H | 4.26730000 | -0.77520000 | -0.68080000 |
| H | 5.29400000 | 0.44580000  | -1.46270000 |
| H | 4.51270000 | 0.81320000  | 0.09210000  |

---

**Species TSANO**

HF energy= -2359.67996412

Imaginary frequency= 24i

Zero-point correction= 0.279226 (Hartree/Particle)

Thermal correction to Energy= 0.320525

Thermal correction to Enthalpy= 0.321470

Thermal correction to Gibbs Free Energy= 0.197845

Sum of electronic and zero-point Energies= -2359.400738

Sum of electronic and thermal Energies= -2359.359439

Sum of electronic and thermal Enthalpies= -2359.358495

Sum of electronic and thermal Free Energies= -2359.482119

**Coordinates: TSANO**

|    |             |             |             |
|----|-------------|-------------|-------------|
| Os | -1.57160000 | 1.34380000  | 1.15560000  |
| Os | 0.25420000  | -0.91720000 | 1.37360000  |
| Os | 1.41380000  | 1.69680000  | 1.39720000  |
| O  | -3.16750000 | 3.95980000  | 0.78150000  |
| O  | -1.95080000 | 1.51410000  | 4.23670000  |
| O  | -3.98410000 | -0.51010000 | 0.73590000  |
| O  | -2.01820000 | -3.00020000 | 1.28410000  |
| O  | 0.25730000  | -0.78500000 | 4.43050000  |
| O  | 2.56710000  | -2.96740000 | 1.41270000  |
| O  | 3.96150000  | -0.00780000 | 1.76060000  |
| O  | 2.70120000  | 4.36750000  | 0.50330000  |
| O  | 1.51940000  | 2.61760000  | 4.25700000  |
| N  | 0.25970000  | -0.82590000 | -0.83770000 |
| C  | -0.97060000 | 0.78480000  | -3.88590000 |
| C  | -1.71640000 | 1.83020000  | -3.34950000 |
| C  | -1.84570000 | 1.99850000  | -1.95700000 |
| C  | -1.24680000 | 1.15000000  | -1.00610000 |
| C  | -0.35180000 | -0.07150000 | -2.97350000 |
| C  | -0.47850000 | 0.11190000  | -1.57620000 |
| C  | -2.55620000 | 2.98860000  | 0.89300000  |
| C  | -1.78210000 | 1.43850000  | 3.10170000  |
| C  | -3.06590000 | 0.16050000  | 0.91740000  |
| C  | -1.18370000 | -2.20640000 | 1.29590000  |
| C  | 0.24150000  | -0.81640000 | 3.27760000  |
| C  | 1.72940000  | -2.17420000 | 1.36990000  |

|   |             |             |             |
|---|-------------|-------------|-------------|
| C | 2.96800000  | 0.55030000  | 1.58750000  |
| C | 2.19560000  | 3.39550000  | 0.85290000  |
| C | 1.49610000  | 2.28350000  | 3.15320000  |
| H | -0.17890000 | 2.52980000  | 1.14380000  |
| S | 0.69550000  | -1.43660000 | -3.31150000 |
| C | 0.90410000  | -1.66120000 | -1.60990000 |
| H | 1.54290000  | -2.44860000 | -1.23060000 |
| H | -2.45890000 | 2.83040000  | -1.61860000 |
| H | -2.21900000 | 2.52700000  | -4.01800000 |
| H | -0.87000000 | 0.64480000  | -4.95880000 |
| C | 1.98220000  | 2.18990000  | -2.14740000 |
| H | 1.09830000  | 2.77370000  | -2.30370000 |
| C | 2.97460000  | 1.50980000  | -1.99730000 |
| C | 4.10680000  | 0.61100000  | -1.83060000 |
| O | 3.98310000  | -0.56510000 | -1.55870000 |
| O | 5.26490000  | 1.25130000  | -2.02290000 |
| C | 6.48290000  | 0.46280000  | -1.89000000 |
| H | 7.18910000  | 0.96350000  | -2.55800000 |
| H | 6.28390000  | -0.54780000 | -2.25790000 |
| C | 6.97380000  | 0.45190000  | -0.44990000 |
| H | 6.25380000  | -0.04600000 | 0.20770000  |
| H | 7.92490000  | -0.09260000 | -0.39300000 |
| H | 7.14040000  | 1.47280000  | -0.08680000 |

---

### Species O

HF energy= -2359.69126103

No imaginary frequency

Zero-point correction= 0.279866 (Hartree/Particle)

Thermal correction to Energy= 0.321042

Thermal correction to Enthalpy= 0.321986

Thermal correction to Gibbs Free Energy= 0.201353

Sum of electronic and zero-point Energies= -2359.411395

Sum of electronic and thermal Energies= -2359.370219

Sum of electronic and thermal Enthalpies= -2359.369275

Sum of electronic and thermal Free Energies= -2359.489908

### Coordinates: O

|    |             |             |            |
|----|-------------|-------------|------------|
| Os | -1.39150000 | 1.41190000  | 0.99020000 |
| Os | 0.44260000  | -0.81500000 | 1.20500000 |
| Os | 1.76810000  | 1.87760000  | 1.12590000 |
| O  | -2.87620000 | 4.09280000  | 0.59060000 |
| O  | -1.73970000 | 1.64890000  | 4.07120000 |
| O  | -3.87750000 | -0.35930000 | 0.81420000 |
| O  | -1.81210000 | -2.89790000 | 1.23970000 |
| O  | 0.50190000  | -0.67000000 | 4.25870000 |

|   |             |             |             |
|---|-------------|-------------|-------------|
| O | 2.77940000  | -2.84360000 | 1.21430000  |
| O | 4.14110000  | 0.08090000  | 1.94580000  |
| O | 3.16630000  | 4.64180000  | 0.92700000  |
| O | 1.27650000  | 2.53760000  | 4.06460000  |
| N | 0.32210000  | -0.82320000 | -1.00170000 |
| C | -1.19460000 | 0.56090000  | -4.03350000 |
| C | -1.96820000 | 1.58530000  | -3.49760000 |
| C | -2.00670000 | 1.82360000  | -2.10970000 |
| C | -1.28060000 | 1.07330000  | -1.16530000 |
| C | -0.46310000 | -0.20820000 | -3.12620000 |
| C | -0.50680000 | 0.03910000  | -1.73450000 |
| C | -2.31260000 | 3.09450000  | 0.71060000  |
| C | -1.53830000 | 1.56780000  | 2.94160000  |
| C | -2.93130000 | 0.29180000  | 0.90550000  |
| C | -0.97830000 | -2.10210000 | 1.21230000  |
| C | 0.47170000  | -0.69720000 | 3.10560000  |
| C | 1.93460000  | -2.05810000 | 1.17810000  |
| C | 3.22020000  | 0.69120000  | 1.61210000  |
| C | 2.60610000  | 3.63850000  | 0.96850000  |
| C | 1.42640000  | 2.24930000  | 2.96290000  |
| H | 0.11310000  | 2.52550000  | 0.78360000  |
| S | 0.62430000  | -1.54250000 | -3.46720000 |
| C | 0.94860000  | -1.67230000 | -1.77290000 |
| H | 1.64250000  | -2.41410000 | -1.39990000 |
| H | -2.64460000 | 2.63580000  | -1.76790000 |
| H | -2.56000000 | 2.21270000  | -4.16180000 |
| H | -1.16070000 | 0.36840000  | -5.10240000 |
| C | 1.64120000  | 2.11530000  | -1.25260000 |
| H | 0.81300000  | 2.66750000  | -1.64920000 |
| C | 2.65170000  | 1.42360000  | -1.10360000 |
| C | 3.85070000  | 0.61800000  | -1.38910000 |
| O | 3.81530000  | -0.56230000 | -1.65180000 |
| O | 4.94540000  | 1.37930000  | -1.33770000 |
| C | 6.21790000  | 0.72990000  | -1.64240000 |
| H | 6.83440000  | 1.54800000  | -2.02400000 |
| H | 6.04730000  | -0.00180000 | -2.43730000 |
| C | 6.82530000  | 0.08940000  | -0.40430000 |
| H | 6.19690000  | -0.72570000 | -0.03130000 |
| H | 7.80970000  | -0.32350000 | -0.65880000 |
| H | 6.95800000  | 0.82740000  | 0.39470000  |

---

### Species TSOP

HF energy= -2359.66695751

Imaginary frequency= 833i

Zero-point correction= 0.277927 (Hartree/Particle)

|                                              |              |
|----------------------------------------------|--------------|
| Thermal correction to Energy=                | 0.318873     |
| Thermal correction to Enthalpy=              | 0.319817     |
| Thermal correction to Gibbs Free Energy=     | 0.198775     |
| Sum of electronic and zero-point Energies=   | -2359.389030 |
| Sum of electronic and thermal Energies=      | -2359.348084 |
| Sum of electronic and thermal Enthalpies=    | -2359.347140 |
| Sum of electronic and thermal Free Energies= | -2359.468182 |

Coordinates: **TSOP**

|    |             |             |             |
|----|-------------|-------------|-------------|
| Os | -1.28830000 | 1.39810000  | 0.94610000  |
| Os | 0.37230000  | -0.89660000 | 1.28560000  |
| Os | 1.86220000  | 1.78460000  | 1.31440000  |
| O  | -2.30110000 | 4.27880000  | 0.43460000  |
| O  | -1.81650000 | 1.64710000  | 4.00050000  |
| O  | -4.00110000 | 0.05320000  | 0.67310000  |
| O  | -2.05960000 | -2.75970000 | 1.20370000  |
| O  | 0.30220000  | -0.73480000 | 4.33870000  |
| O  | 2.55380000  | -3.09540000 | 1.39740000  |
| O  | 3.91990000  | -0.25740000 | 2.33660000  |
| O  | 3.68550000  | 4.29050000  | 1.43360000  |
| O  | 1.08830000  | 2.63110000  | 4.16640000  |
| N  | 0.40030000  | -0.92840000 | -0.92680000 |
| C  | -1.07360000 | 0.33910000  | -4.03000000 |
| C  | -1.86900000 | 1.37020000  | -3.54130000 |
| C  | -1.92040000 | 1.66450000  | -2.16440000 |
| C  | -1.18950000 | 0.95900000  | -1.19170000 |
| C  | -0.34100000 | -0.38800000 | -3.08830000 |
| C  | -0.40790000 | -0.09300000 | -1.70860000 |
| C  | -1.92360000 | 3.20300000  | 0.60050000  |
| C  | -1.52470000 | 1.56910000  | 2.89150000  |
| C  | -2.97280000 | 0.55860000  | 0.79780000  |
| C  | -1.15230000 | -2.04840000 | 1.21840000  |
| C  | 0.31800000  | -0.77090000 | 3.18620000  |
| C  | 1.77380000  | -2.24790000 | 1.33540000  |
| C  | 3.06210000  | 0.42570000  | 1.97350000  |
| C  | 2.98330000  | 3.38540000  | 1.34660000  |
| C  | 1.30620000  | 2.27940000  | 3.09330000  |
| H  | 0.49760000  | 2.27540000  | 0.20460000  |
| S  | 0.76130000  | -1.72470000 | -3.36050000 |
| C  | 1.05090000  | -1.79560000 | -1.65840000 |
| H  | 1.73840000  | -2.52360000 | -1.24740000 |
| H  | -2.56750000 | 2.48360000  | -1.85570000 |
| H  | -2.46370000 | 1.96190000  | -4.23470000 |
| H  | -1.02550000 | 0.10870000  | -5.09080000 |
| C  | 1.50770000  | 2.26110000  | -0.94270000 |
| H  | 0.88150000  | 2.85930000  | -1.58650000 |

|   |            |             |             |
|---|------------|-------------|-------------|
| C | 2.52590000 | 1.51640000  | -0.80760000 |
| C | 3.68490000 | 0.84480000  | -1.40550000 |
| O | 3.66580000 | -0.27650000 | -1.86530000 |
| O | 4.76800000 | 1.63450000  | -1.33680000 |
| C | 6.02070000 | 1.08030000  | -1.83010000 |
| H | 6.58950000 | 1.96120000  | -2.14020000 |
| H | 5.80610000 | 0.45820000  | -2.70370000 |
| C | 6.73910000 | 0.29640000  | -0.74190000 |
| H | 6.15410000 | -0.57810000 | -0.43750000 |
| H | 7.70770000 | -0.05410000 | -1.12050000 |
| H | 6.92070000 | 0.92460000  | 0.13780000  |

---

### Species P

HF energy= -2359.73045641

No imaginary frequency

Zero-point correction= 0.284173 (Hartree/Particle)

Thermal correction to Energy= 0.325039

Thermal correction to Enthalpy= 0.325983

Thermal correction to Gibbs Free Energy= 0.206549

Sum of electronic and zero-point Energies= -2359.446284

Sum of electronic and thermal Energies= -2359.405418

Sum of electronic and thermal Enthalpies= -2359.404474

Sum of electronic and thermal Free Energies= -2359.523908

### Coordinates: P

|    |             |             |             |
|----|-------------|-------------|-------------|
| Os | -1.32940000 | 0.95040000  | 1.41450000  |
| Os | 0.71090000  | -1.00930000 | 1.00040000  |
| Os | 1.22650000  | 1.81290000  | 0.52750000  |
| O  | -3.38470000 | 3.27030000  | 1.56860000  |
| O  | -1.75080000 | 0.15380000  | 4.37080000  |
| O  | -3.30320000 | -1.18940000 | 0.48140000  |
| O  | -0.92160000 | -3.59200000 | 1.47040000  |
| O  | 1.46600000  | -0.72610000 | 3.95120000  |
| O  | 3.37980000  | -2.46680000 | 0.47890000  |
| O  | 3.69220000  | 1.33600000  | 2.25660000  |
| O  | 1.67830000  | 4.82830000  | -0.08240000 |
| O  | 0.30290000  | 3.19310000  | 3.13850000  |
| N  | 0.10600000  | -0.88360000 | -1.10620000 |
| C  | -1.18490000 | 1.44510000  | -3.59800000 |
| C  | -1.50180000 | 2.55040000  | -2.80590000 |
| C  | -1.32310000 | 2.51500000  | -1.41450000 |
| C  | -0.81470000 | 1.38580000  | -0.72650000 |
| C  | -0.66760000 | 0.31240000  | -2.96350000 |
| C  | -0.47890000 | 0.29260000  | -1.57010000 |
| C  | -2.57930000 | 2.44990000  | 1.50730000  |

|   |             |             |             |
|---|-------------|-------------|-------------|
| C | -1.58530000 | 0.44840000  | 3.27260000  |
| C | -2.54340000 | -0.40400000 | 0.84840000  |
| C | -0.32870000 | -2.62200000 | 1.28040000  |
| C | 1.17750000  | -0.82720000 | 2.83950000  |
| C | 2.39560000  | -1.87950000 | 0.60810000  |
| C | 2.77670000  | 1.48140000  | 1.57220000  |
| C | 1.46860000  | 3.71170000  | 0.08760000  |
| C | 0.33990000  | 2.51430000  | 2.19580000  |
| H | 1.56000000  | 3.05930000  | -2.47010000 |
| S | -0.11700000 | -1.19990000 | -3.66440000 |
| C | 0.34400000  | -1.72330000 | -2.07800000 |
| H | 0.82100000  | -2.68390000 | -1.92150000 |
| H | -1.60020000 | 3.39790000  | -0.84270000 |
| H | -1.89830000 | 3.44750000  | -3.27610000 |
| H | -1.33040000 | 1.47000000  | -4.67510000 |
| C | 2.26360000  | 2.23340000  | -2.38830000 |
| H | 2.81940000  | 1.99250000  | -3.29690000 |
| C | 2.43840000  | 1.52590000  | -1.25700000 |
| C | 3.48160000  | 0.45650000  | -1.36320000 |
| O | 3.40270000  | -0.51580000 | -2.09110000 |
| O | 4.55340000  | 0.71410000  | -0.58960000 |
| C | 5.67600000  | -0.19840000 | -0.69610000 |
| H | 5.97940000  | -0.25070000 | -1.74840000 |
| H | 5.34880000  | -1.19660000 | -0.38990000 |
| C | 6.78310000  | 0.33870000  | 0.19330000  |
| H | 6.45390000  | 0.39470000  | 1.23700000  |
| H | 7.65490000  | -0.32510000 | 0.13970000  |
| H | 7.09200000  | 1.34110000  | -0.12580000 |

---

### Species TSPQ

HF energy= -2359.72562112

Imaginary frequency= 13i

Zero-point correction= 0.284095 (Hartree/Particle)

Thermal correction to Energy= 0.324038

Thermal correction to Enthalpy= 0.324983

Thermal correction to Gibbs Free Energy= 0.208273

Sum of electronic and zero-point Energies= -2359.441526

Sum of electronic and thermal Energies= -2359.401583

Sum of electronic and thermal Enthalpies= -2359.400638

Sum of electronic and thermal Free Energies= -2359.517348

### Coordinates: TSPQ

Os -1.56300000 0.93210000 1.26830000

Os 0.78040000 -0.74540000 1.40650000

Os 0.98450000 2.06100000 0.77080000

|   |             |             |             |
|---|-------------|-------------|-------------|
| O | -3.98860000 | 2.78240000  | 0.71800000  |
| O | -2.37920000 | 0.34190000  | 4.18080000  |
| O | -2.90160000 | -1.66720000 | 0.31930000  |
| O | -0.35920000 | -3.57220000 | 1.95970000  |
| O | 1.04230000  | -0.12130000 | 4.38970000  |
| O | 3.75080000  | -1.52710000 | 1.16340000  |
| O | 2.99590000  | 2.26830000  | 3.05560000  |
| O | 0.89890000  | 4.96670000  | -0.33390000 |
| O | -0.68950000 | 3.55970000  | 2.86430000  |
| N | 0.40170000  | -0.95580000 | -0.75260000 |
| C | -0.85840000 | 0.85660000  | -3.65360000 |
| C | -1.28270000 | 2.05160000  | -3.06720000 |
| C | -1.19200000 | 2.24440000  | -1.68090000 |
| C | -0.65290000 | 1.27560000  | -0.79760000 |
| C | -0.31120000 | -0.12160000 | -2.82180000 |
| C | -0.19080000 | 0.09890000  | -1.43770000 |
| C | -3.05580000 | 2.13950000  | 0.92090000  |
| C | -2.07480000 | 0.55970000  | 3.09430000  |
| C | -2.37060000 | -0.71280000 | 0.68670000  |
| C | 0.03910000  | -2.51350000 | 1.73380000  |
| C | 0.94710000  | -0.34610000 | 3.26300000  |
| C | 2.64220000  | -1.21440000 | 1.23400000  |
| C | 2.23860000  | 2.17350000  | 2.19280000  |
| C | 0.91780000  | 3.88600000  | 0.05420000  |
| C | -0.42990000 | 2.75010000  | 2.06360000  |
| H | 3.62500000  | 3.98610000  | 0.38620000  |
| S | 0.32660000  | -1.70400000 | -3.22850000 |
| C | 0.71500000  | -1.93650000 | -1.55620000 |
| H | 1.19470000  | -2.84620000 | -1.21190000 |
| H | -1.57370000 | 3.17630000  | -1.26890000 |
| H | -1.70390000 | 2.83390000  | -3.69430000 |
| H | -0.94770000 | 0.69930000  | -4.72570000 |
| C | 3.79590000  | 3.09620000  | -0.21730000 |
| H | 4.74560000  | 3.06000000  | -0.74930000 |
| C | 2.90270000  | 2.09420000  | -0.31180000 |
| C | 3.29460000  | 0.97370000  | -1.22490000 |
| O | 2.58400000  | 0.44410000  | -2.05830000 |
| O | 4.58570000  | 0.61420000  | -1.04850000 |
| C | 5.09600000  | -0.41620000 | -1.92280000 |
| H | 4.98460000  | -0.08610000 | -2.96300000 |
| H | 4.49060000  | -1.32100000 | -1.79280000 |
| C | 6.54820000  | -0.65030000 | -1.54600000 |
| H | 6.62980000  | -0.97410000 | -0.50230000 |
| H | 6.97890000  | -1.42950000 | -2.18700000 |
| H | 7.13810000  | 0.26510000  | -1.67190000 |

---

### Species Q

HF energy= -2359.73178912

No imaginary frequency

Zero-point correction= 0.284230 (Hartree/Particle)

Thermal correction to Energy= 0.324991

Thermal correction to Enthalpy= 0.325936

Thermal correction to Gibbs Free Energy= 0.207088

Sum of electronic and zero-point Energies= -2359.447559

Sum of electronic and thermal Energies= -2359.406798

Sum of electronic and thermal Enthalpies= -2359.405854

Sum of electronic and thermal Free Energies= -2359.524701

### Coordinates: Q

|    |             |             |             |
|----|-------------|-------------|-------------|
| Os | -1.59180000 | 0.94960000  | 1.11380000  |
| Os | 0.61620000  | -0.58750000 | 2.09110000  |
| Os | 1.00190000  | 2.06720000  | 1.03120000  |
| O  | -3.79580000 | 2.64340000  | -0.26320000 |
| O  | -3.09220000 | 0.88510000  | 3.80660000  |
| O  | -2.71610000 | -1.78400000 | 0.32310000  |
| O  | -0.66850000 | -3.31370000 | 2.80180000  |
| O  | 0.12110000  | 0.56860000  | 4.87840000  |
| O  | 3.52660000  | -1.33040000 | 2.78650000  |
| O  | 2.52200000  | 2.73190000  | 3.58170000  |
| O  | 1.38570000  | 4.83490000  | -0.36210000 |
| O  | -1.09600000 | 3.92720000  | 2.33720000  |
| N  | 0.86840000  | -1.13370000 | -0.02820000 |
| C  | 0.33140000  | 0.10510000  | -3.41960000 |
| C  | -0.30400000 | 1.32130000  | -3.16850000 |
| C  | -0.58130000 | 1.73380000  | -1.85630000 |
| C  | -0.24930000 | 0.96380000  | -0.71710000 |
| C  | 0.70730000  | -0.67500000 | -2.32140000 |
| C  | 0.42670000  | -0.24900000 | -1.01010000 |
| C  | -2.93980000 | 2.06610000  | 0.24630000  |
| C  | -2.52980000 | 0.90390000  | 2.80430000  |
| C  | -2.27480000 | -0.76950000 | 0.64970000  |
| C  | -0.20450000 | -2.29920000 | 2.50920000  |
| C  | 0.30510000  | 0.13890000  | 3.82420000  |
| C  | 2.44600000  | -1.04100000 | 2.50440000  |
| C  | 1.94680000  | 2.46850000  | 2.61710000  |
| C  | 1.27030000  | 3.77380000  | 0.05370000  |
| C  | -0.59810000 | 3.01830000  | 1.80870000  |
| H  | 4.16910000  | 1.30230000  | 1.96840000  |
| S  | 1.53170000  | -2.22630000 | -2.28050000 |
| C  | 1.45150000  | -2.18120000 | -0.54640000 |
| H  | 1.87060000  | -2.97950000 | 0.05620000  |



|   |             |             |             |
|---|-------------|-------------|-------------|
| H | -1.08670000 | 2.68660000  | -1.71660000 |
| H | -0.58820000 | 1.95670000  | -4.00380000 |
| H | 0.53150000  | -0.22050000 | -4.43750000 |
| C | 4.10560000  | 1.31650000  | 0.88400000  |
| H | 5.03710000  | 1.11950000  | 0.35450000  |
| C | 2.96180000  | 1.56620000  | 0.21610000  |
| C | 3.10790000  | 1.67430000  | -1.27410000 |
| O | 2.53970000  | 2.48880000  | -1.97760000 |
| O | 3.97810000  | 0.76870000  | -1.78600000 |
| C | 4.28610000  | 0.90510000  | -3.19110000 |
| H | 4.67400000  | 1.91480000  | -3.37180000 |
| H | 3.35980000  | 0.80060000  | -3.76870000 |
| C | 5.30260000  | -0.16730000 | -3.54190000 |
| H | 4.89910000  | -1.16900000 | -3.35150000 |
| H | 5.56710000  | -0.09750000 | -4.60430000 |
| H | 6.21790000  | -0.04760000 | -2.95090000 |

---

### Species TSQR

HF energy= -2359.71339888

Imaginary frequency= 102i

Zero-point correction= 0.283599 (Hartree/Particle)

Thermal correction to Energy= 0.323690

Thermal correction to Enthalpy= 0.324634

Thermal correction to Gibbs Free Energy= 0.207853

Sum of electronic and zero-point Energies= -2359.429800

Sum of electronic and thermal Energies= -2359.389709

Sum of electronic and thermal Enthalpies= -2359.388765

Sum of electronic and thermal Free Energies= -2359.505546

### Coordinates: TSQR

|    |             |             |             |
|----|-------------|-------------|-------------|
| Os | -1.54120000 | 0.79790000  | 1.21480000  |
| Os | 1.15740000  | -0.46640000 | 1.46480000  |
| Os | 0.75800000  | 2.39960000  | 0.88370000  |
| O  | -4.23230000 | 2.12820000  | 0.51990000  |
| O  | -2.21810000 | 0.43610000  | 4.19790000  |
| O  | -2.59270000 | -1.93940000 | 0.26770000  |
| O  | -0.37060000 | -2.91840000 | 2.45940000  |
| O  | 1.45250000  | 0.57190000  | 4.33090000  |
| O  | 3.82870000  | -2.01730000 | 1.57090000  |
| O  | 2.15920000  | 3.82720000  | 3.16740000  |
| O  | 1.52000000  | 4.68440000  | -1.00750000 |
| O  | -1.63380000 | 3.97780000  | 1.94010000  |
| N  | 0.81440000  | -0.81860000 | -0.68160000 |
| C  | -0.57160000 | 0.75330000  | -3.67120000 |
| C  | -1.18490000 | 1.87780000  | -3.12540000 |

|   |             |             |             |
|---|-------------|-------------|-------------|
| C | -1.20160000 | 2.09180000  | -1.73370000 |
| C | -0.59000000 | 1.21450000  | -0.81290000 |
| C | 0.06110000  | -0.13130000 | -2.78960000 |
| C | 0.08100000  | 0.11950000  | -1.40890000 |
| C | -3.21610000 | 1.65460000  | 0.77940000  |
| C | -1.98290000 | 0.56140000  | 3.07780000  |
| C | -2.12980000 | -0.95360000 | 0.64830000  |
| C | 0.16660000  | -1.98220000 | 2.05610000  |
| C | 1.33400000  | 0.19490000  | 3.25090000  |
| C | 2.85170000  | -1.41860000 | 1.48010000  |
| C | 1.64310000  | 3.28030000  | 2.29160000  |
| C | 1.26790000  | 3.81600000  | -0.29470000 |
| C | -0.98420000 | 3.09490000  | 1.51510000  |
| H | 3.82840000  | 1.74040000  | 2.36820000  |
| S | 0.95040000  | -1.60350000 | -3.14010000 |
| C | 1.30710000  | -1.75410000 | -1.45320000 |
| H | 1.90860000  | -2.57380000 | -1.07620000 |
| H | -1.72880000 | 2.96630000  | -1.35840000 |
| H | -1.67230000 | 2.59250000  | -3.78440000 |
| H | -0.57370000 | 0.57730000  | -4.74370000 |
| C | 3.91030000  | 1.53300000  | 1.30300000  |
| H | 4.92290000  | 1.51970000  | 0.90140000  |
| C | 2.82850000  | 1.31300000  | 0.51300000  |
| C | 3.17010000  | 1.09790000  | -0.93360000 |
| O | 2.59950000  | 1.60730000  | -1.87920000 |
| O | 4.22700000  | 0.26110000  | -1.10180000 |
| C | 4.72920000  | 0.12220000  | -2.45080000 |
| H | 4.95440000  | 1.11930000  | -2.84700000 |
| H | 3.94360000  | -0.31250000 | -3.08090000 |
| C | 5.96360000  | -0.76060000 | -2.39020000 |
| H | 5.72150000  | -1.75180000 | -1.98860000 |
| H | 6.37970000  | -0.88850000 | -3.39710000 |
| H | 6.73420000  | -0.31230000 | -1.75290000 |

---

### Species R

HF energy= -2359.72363500

No imaginary frequency

Zero-point correction= 0.284742 (Hartree/Particle)

Thermal correction to Energy= 0.325085

Thermal correction to Enthalpy= 0.326029

Thermal correction to Gibbs Free Energy= 0.208573

Sum of electronic and zero-point Energies= -2359.438893

Sum of electronic and thermal Energies= -2359.398550

Sum of electronic and thermal Enthalpies= -2359.397606

Sum of electronic and thermal Free Energies= -2359.515062

Coordinates: **R**

|    |             |             |             |
|----|-------------|-------------|-------------|
| Os | -1.60220000 | 0.96160000  | 1.12370000  |
| Os | 1.19110000  | -0.46650000 | 1.61540000  |
| Os | 0.82810000  | 2.39290000  | 0.56600000  |
| O  | -3.92900000 | 2.75600000  | 0.28220000  |
| O  | -2.63870000 | 0.75600000  | 4.02370000  |
| O  | -3.02980000 | -1.59170000 | 0.04250000  |
| O  | -1.08170000 | -2.22610000 | 2.77030000  |
| O  | 1.62790000  | 0.95040000  | 4.29460000  |
| O  | 3.01980000  | -2.86560000 | 2.27520000  |
| O  | 3.01960000  | 3.73340000  | 2.19480000  |
| O  | 0.62340000  | 4.91160000  | -1.13680000 |
| O  | -0.96650000 | 3.69170000  | 2.56860000  |
| N  | 0.80960000  | -0.97530000 | -0.49860000 |
| C  | -0.43800000 | 0.26610000  | -3.71090000 |
| C  | -1.08910000 | 1.43080000  | -3.32200000 |
| C  | -1.16900000 | 1.80240000  | -1.96550000 |
| C  | -0.59700000 | 1.05210000  | -0.91550000 |
| C  | 0.16340000  | -0.49570000 | -2.69920000 |
| C  | 0.10970000  | -0.10730000 | -1.34910000 |
| C  | -3.05620000 | 2.07800000  | 0.60520000  |
| C  | -2.26360000 | 0.82840000  | 2.94080000  |
| C  | -2.41870000 | -0.70770000 | 0.45340000  |
| C  | -0.34770000 | -1.48260000 | 2.28130000  |
| C  | 1.45230000  | 0.42010000  | 3.29020000  |
| C  | 2.34880000  | -1.97830000 | 1.98620000  |
| C  | 2.20330000  | 3.21580000  | 1.56070000  |
| C  | 0.72200000  | 3.96080000  | -0.48800000 |
| C  | -0.62980000 | 2.86200000  | 1.78720000  |
| H  | 4.26530000  | 0.24290000  | 2.75120000  |
| S  | 1.07280000  | -1.98790000 | -2.86160000 |
| C  | 1.33830000  | -1.97950000 | -1.15270000 |
| H  | 1.92540000  | -2.75390000 | -0.67290000 |
| H  | -1.71890000 | 2.70860000  | -1.72330000 |
| H  | -1.55730000 | 2.06040000  | -4.07550000 |
| H  | -0.38800000 | -0.03610000 | -4.75340000 |
| C  | 4.26920000  | 0.45810000  | 1.68350000  |
| H  | 5.22150000  | 0.79450000  | 1.27330000  |
| C  | 3.16040000  | 0.36060000  | 0.92320000  |
| C  | 3.31090000  | 0.77460000  | -0.49230000 |
| O  | 2.48640000  | 1.47700000  | -1.08040000 |
| O  | 4.41780000  | 0.33720000  | -1.10300000 |
| C  | 4.65060000  | 0.80070000  | -2.45960000 |
| H  | 4.63730000  | 1.89640000  | -2.46070000 |
| H  | 3.82440000  | 0.45440000  | -3.09170000 |

|   |            |             |             |
|---|------------|-------------|-------------|
| C | 5.98870000 | 0.24090000  | -2.90610000 |
| H | 5.98280000 | -0.85510000 | -2.89030000 |
| H | 6.20300000 | 0.57050000  | -3.93000000 |
| H | 6.79700000 | 0.59200000  | -2.25470000 |

---

**Species TSRS**

HF energy= -2359.71885780

Imaginary frequency= 30i

Zero-point correction= 0.284670 (Hartree/Particle)

Thermal correction to Energy= 0.324292

Thermal correction to Enthalpy= 0.325236

Thermal correction to Gibbs Free Energy= 0.209420

Sum of electronic and zero-point Energies= -2359.434188

Sum of electronic and thermal Energies= -2359.394566

Sum of electronic and thermal Enthalpies= -2359.393622

Sum of electronic and thermal Free Energies= -2359.509438

**Coordinates: TSRS**

|    |             |             |             |
|----|-------------|-------------|-------------|
| Os | -1.38210000 | 0.95690000  | 1.21840000  |
| Os | 1.17640000  | -0.61790000 | 1.43190000  |
| Os | 0.89400000  | 2.61960000  | 0.39510000  |
| O  | -3.75470000 | 2.87280000  | 0.77890000  |
| O  | -2.11490000 | 0.41170000  | 4.16710000  |
| O  | -2.95010000 | -1.46730000 | 0.06790000  |
| O  | -0.85730000 | -2.81470000 | 2.19690000  |
| O  | 1.41400000  | 0.33430000  | 4.33240000  |
| O  | 3.49450000  | -2.64700000 | 1.69920000  |
| O  | 3.11070000  | 4.46120000  | 1.35700000  |
| O  | -0.23550000 | 5.05920000  | -0.97820000 |
| O  | -0.47160000 | 3.46270000  | 2.89920000  |
| N  | 0.83590000  | -0.88400000 | -0.72180000 |
| C  | -0.61920000 | 0.52770000  | -3.76920000 |
| C  | -1.30450000 | 1.62640000  | -3.26240000 |
| C  | -1.31470000 | 1.90560000  | -1.88380000 |
| C  | -0.63090000 | 1.13320000  | -0.91660000 |
| C  | 0.06940000  | -0.26700000 | -2.84680000 |
| C  | 0.08030000  | 0.02970000  | -1.46940000 |
| C  | -2.86340000 | 2.16180000  | 0.93450000  |
| C  | -1.84080000 | 0.61580000  | 3.06980000  |
| C  | -2.31830000 | -0.61180000 | 0.50730000  |
| C  | -0.15180000 | -1.95780000 | 1.89290000  |
| C  | 1.30850000  | -0.02940000 | 3.24670000  |
| C  | 2.65810000  | -1.87310000 | 1.54110000  |
| C  | 2.28620000  | 3.74530000  | 0.97630000  |
| C  | 0.20330000  | 4.12290000  | -0.45860000 |

|   |             |             |             |
|---|-------------|-------------|-------------|
| C | -0.31490000 | 2.75960000  | 1.95570000  |
| H | 3.56610000  | 1.35820000  | 2.81920000  |
| S | 1.00880000  | -1.71540000 | -3.16100000 |
| C | 1.35600000  | -1.82340000 | -1.47120000 |
| H | 1.97400000  | -2.62030000 | -1.07410000 |
| H | -1.90280000 | 2.75800000  | -1.55440000 |
| H | -1.85490000 | 2.27530000  | -3.94020000 |
| H | -0.61820000 | 0.29690000  | -4.83090000 |
| C | 3.76270000  | 1.28480000  | 1.75130000  |
| H | 4.73410000  | 1.66100000  | 1.42640000  |
| C | 2.84930000  | 0.80120000  | 0.87520000  |
| C | 3.24920000  | 0.87670000  | -0.55850000 |
| O | 2.61290000  | 1.52120000  | -1.38680000 |
| O | 4.35470000  | 0.18880000  | -0.87110000 |
| C | 4.82320000  | 0.28210000  | -2.24360000 |
| H | 4.97390000  | 1.33960000  | -2.48750000 |
| H | 4.04060000  | -0.10700000 | -2.90580000 |
| C | 6.10810000  | -0.51970000 | -2.33960000 |
| H | 5.93710000  | -1.57190000 | -2.08330000 |
| H | 6.49720000  | -0.47290000 | -3.36400000 |
| H | 6.87090000  | -0.11960000 | -1.66220000 |

---

### Species S

HF energy= -2359.76465596

No imaginary frequency

Zero-point correction= 0.286328 (Hartree/Particle)

Thermal correction to Energy= 0.325699

Thermal correction to Enthalpy= 0.326643

Thermal correction to Gibbs Free Energy= 0.211955

Sum of electronic and zero-point Energies= -2359.478328

Sum of electronic and thermal Energies= -2359.438957

Sum of electronic and thermal Enthalpies= -2359.438013

Sum of electronic and thermal Free Energies= -2359.552701

### Coordinates: S

|    |            |             |             |
|----|------------|-------------|-------------|
| Os | 2.95830000 | 1.24770000  | 1.11170000  |
| Os | 3.35570000 | 2.39000000  | 3.90100000  |
| Os | 5.45220000 | 4.37530000  | 3.59730000  |
| S  | 2.41190000 | 7.98730000  | 3.91220000  |
| N  | 3.74030000 | 5.77370000  | 3.78180000  |
| C  | 3.15860000 | 0.74770000  | -0.73260000 |
| C  | 1.01010000 | 0.91680000  | 1.30160000  |
| C  | 3.45740000 | -0.48280000 | 1.68880000  |
| C  | 1.89980000 | 1.17820000  | 4.22420000  |
| C  | 4.69410000 | 0.96650000  | 4.11160000  |

|   |             |             |             |
|---|-------------|-------------|-------------|
| C | 3.57930000  | 2.96340000  | 5.73470000  |
| C | 6.88770000  | 3.12140000  | 3.53670000  |
| C | 5.99390000  | 4.98230000  | 5.40190000  |
| C | 6.39880000  | 5.58180000  | 2.44220000  |
| O | 3.29010000  | 0.45410000  | -1.83750000 |
| O | -0.12490000 | 0.75440000  | 1.34980000  |
| O | 3.77300000  | -1.53720000 | 2.03040000  |
| O | 1.04570000  | 0.45210000  | 4.50380000  |
| O | 5.46170000  | 0.13360000  | 4.31130000  |
| O | 3.63680000  | 3.24270000  | 6.85200000  |
| O | 7.77370000  | 2.38670000  | 3.51230000  |
| O | 6.31960000  | 5.36540000  | 6.43610000  |
| O | 6.96550000  | 6.28780000  | 1.72720000  |
| C | 3.06260000  | 7.35760000  | -0.23030000 |
| H | 2.41120000  | 7.83500000  | -0.97230000 |
| H | 4.09690000  | 7.42380000  | -0.58660000 |
| H | 2.97810000  | 7.91480000  | 0.70930000  |
| C | 2.64110000  | 5.91230000  | -0.04980000 |
| H | 1.61980000  | 5.81730000  | 0.33410000  |
| H | 2.71590000  | 5.33810000  | -0.97860000 |
| C | 3.43530000  | 4.01790000  | 1.14600000  |
| C | 4.39100000  | 3.32130000  | 2.05710000  |
| C | 4.93030000  | 2.19950000  | 1.18280000  |
| H | 5.72730000  | 1.62450000  | 1.65790000  |
| H | 5.26460000  | 2.52080000  | 0.18700000  |
| C | 1.94130000  | 4.04340000  | 3.71330000  |
| C | 0.54230000  | 3.91520000  | 3.65460000  |
| H | 0.09960000  | 2.92360000  | 3.60440000  |
| C | -0.34340000 | 5.00890000  | 3.66650000  |
| H | -1.41500000 | 4.82400000  | 3.62090000  |
| C | 0.11970000  | 6.31890000  | 3.75200000  |
| H | -0.56030000 | 7.16570000  | 3.78300000  |
| C | 1.50450000  | 6.48700000  | 3.79800000  |
| C | 2.39020000  | 5.38380000  | 3.76220000  |
| C | 3.88000000  | 7.06920000  | 3.86600000  |
| H | 4.84660000  | 7.55850000  | 3.89360000  |
| O | 2.59580000  | 3.34340000  | 0.50330000  |
| O | 3.54300000  | 5.31120000  | 0.93040000  |

---
